# Supplementary material for: The evolution of centriole degradation in mouse sperm
Source: PubMed Central journal article supplement (PMC10761967; doi:10.1038/s41467-023-44411-8), 2024-01-02
Supplement: 41467_2023_44411_MOESM1_ESM.pdf [file 41467_2023_44411_MOESM1_ESM.pdf]

1 **Supplementary figure with grayscale single panels, Supplementary Figures,**  
2 **Supplementary tables, and their Legends**

3  
4 **Supplementary Figures 5, 6, and 7 with grayscale single panels**

5 **Fig 5**

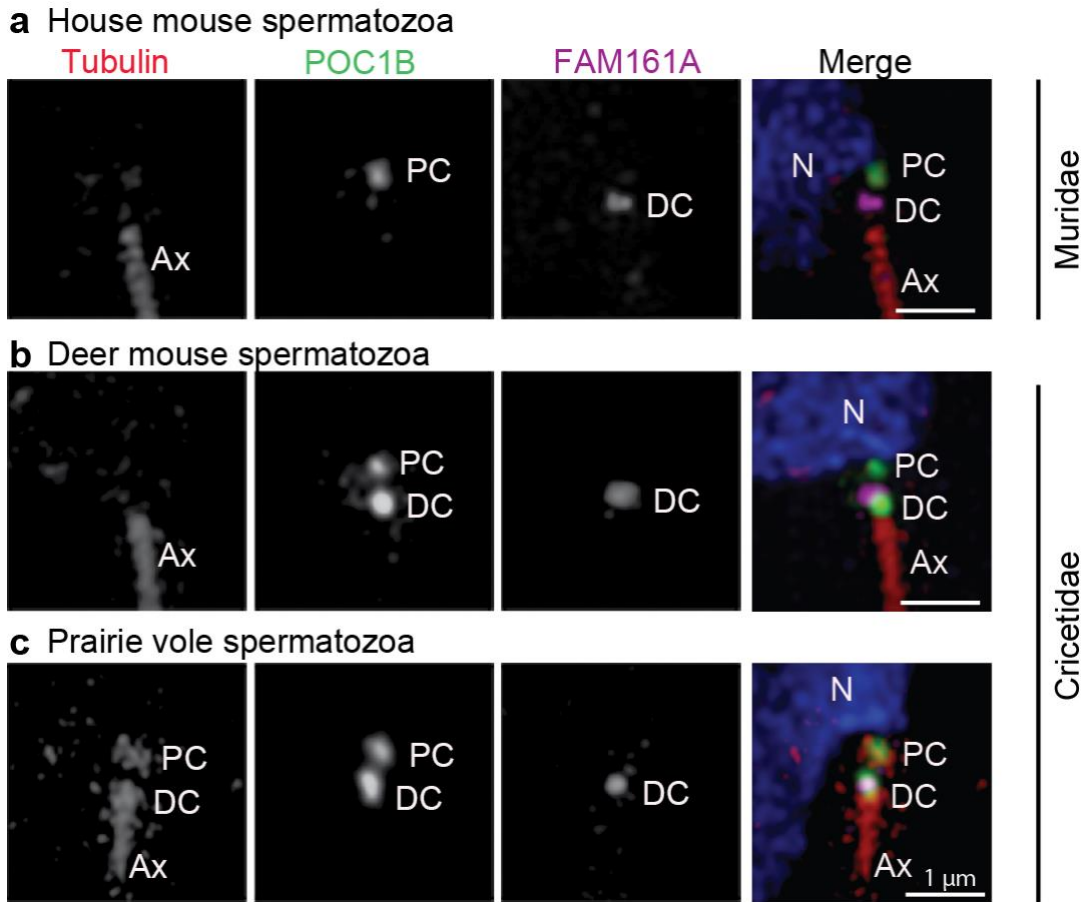

6

7 Fig 6

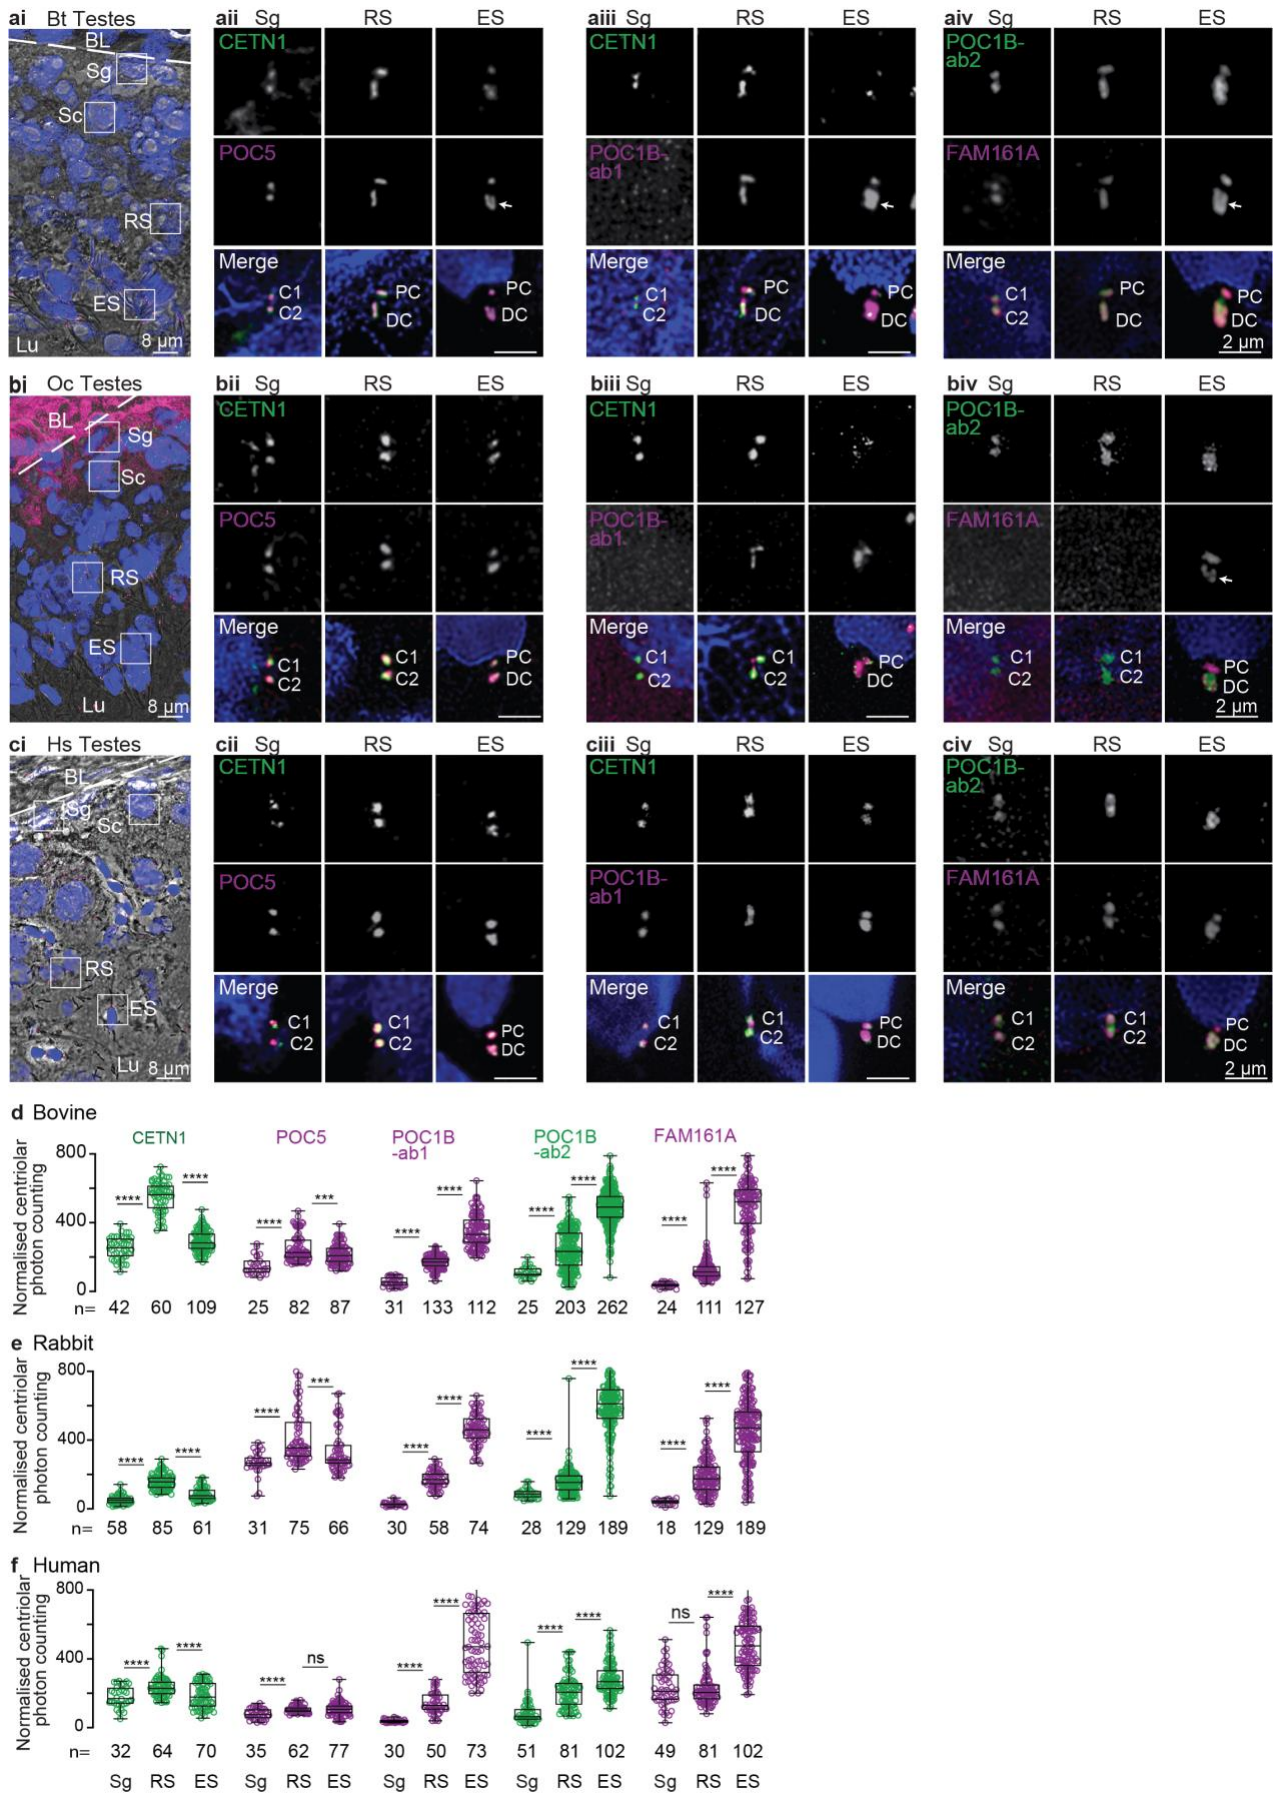

Fig 7

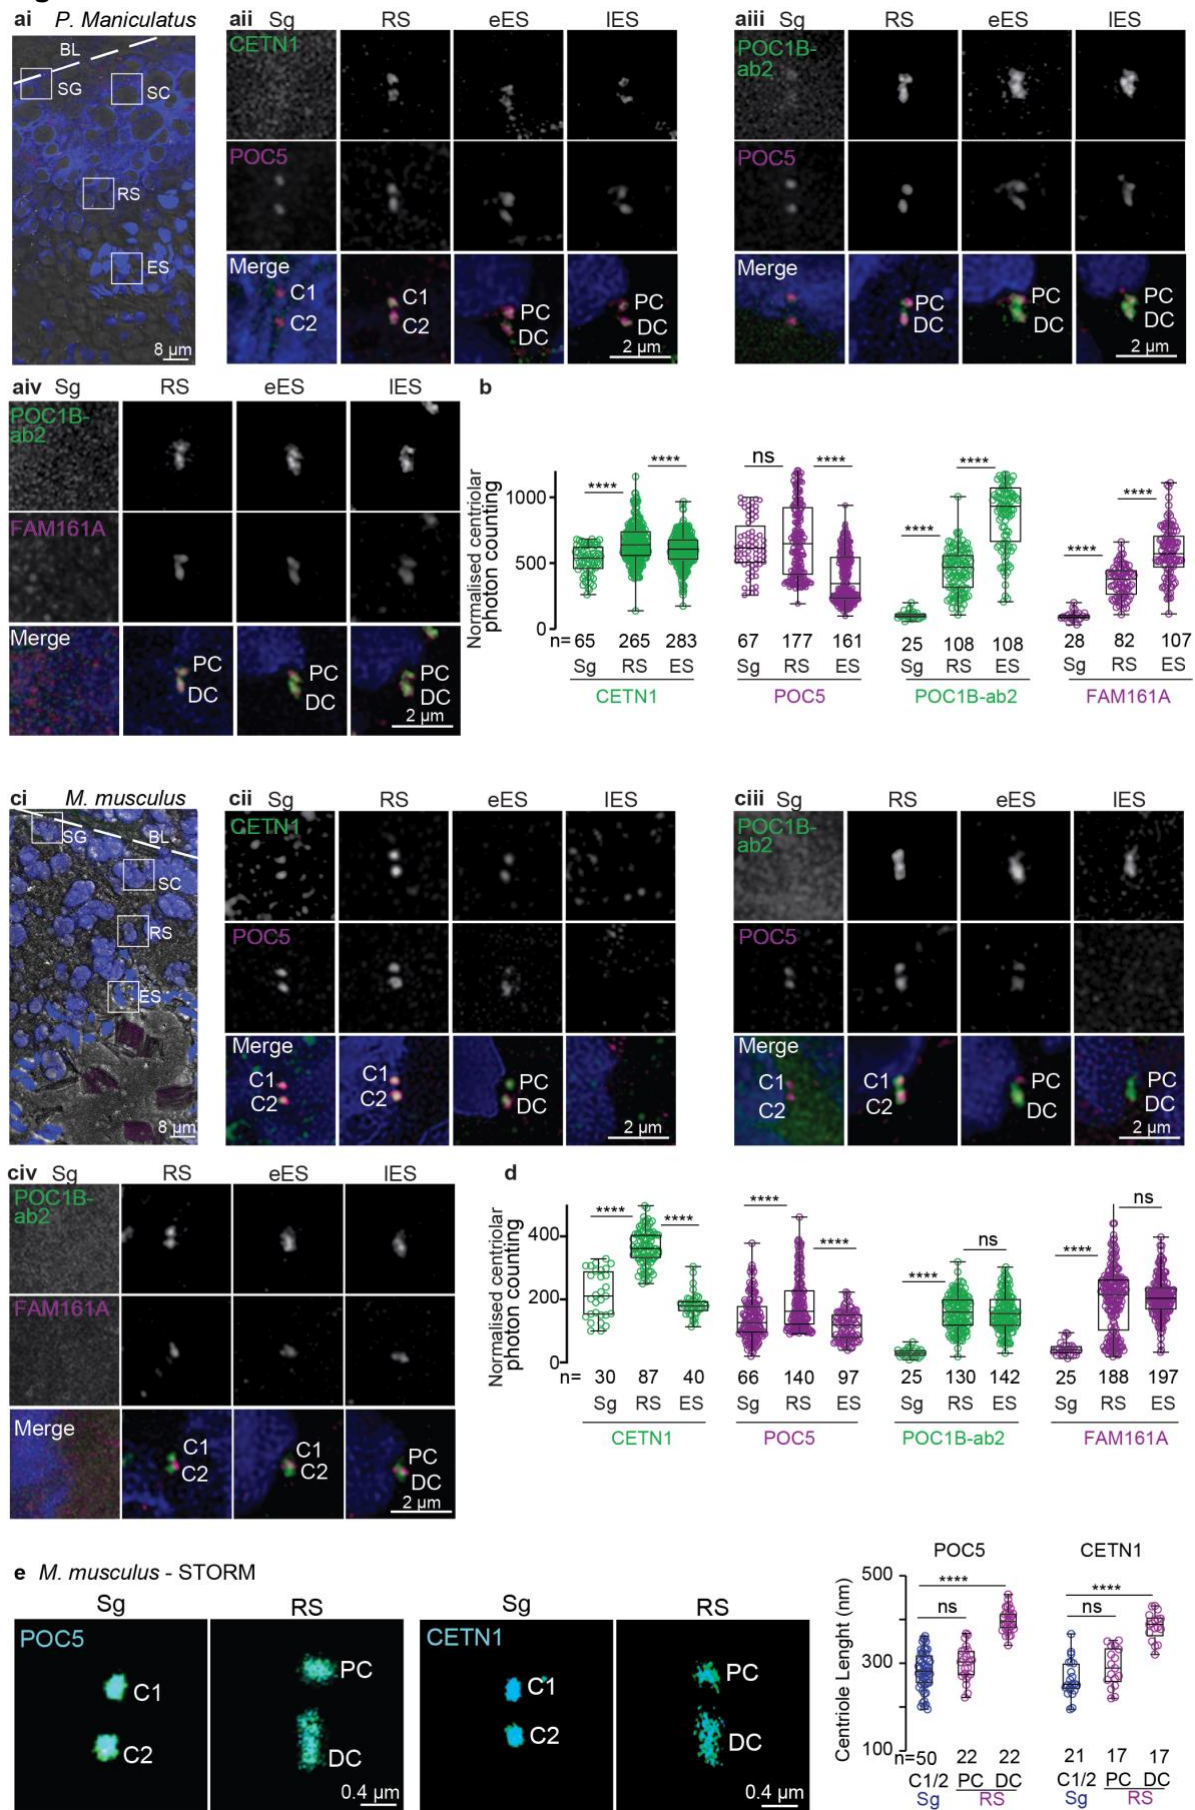

11 **Supplementary Figures, Supplementary Tables, and their Legends**

12 **Supplementary Figure 1– Spermatozoa with one canonical centriole (the proximal centriole) and one**  
 13 **atypical centriole (the distal centriole) are present throughout the mammalian tree of life.**

14 **a)** Example of paddle/eyedrop-shaped sperm head with a centrally inserted neck, barrel-shaped proximal centriole (PC, canonical centriole), and funnel-shaped distal centriole (DC, atypical centriole), as in humans,  
 15 and a sickle-shaped sperm head with a laterally attached neck and no centrioles, as in house mice. Based  
 16 on Knobil and Neill's Physiology of Reproduction <sup>1</sup>. The acrosome is shown in red; the nucleus is shown in  
 17 blue, and all other parts of the sperm are shown in green. **b)** A systematic survey of previous transmission  
 18 electron microscopic studies of Eutherian spermatozoan centrioles.  
 19

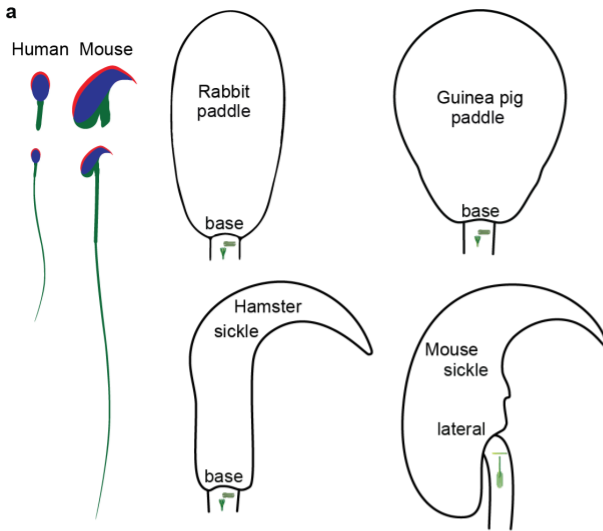

**b bi) Eutherian:** The four main groups of Eutherian mammalian species (color-coded) have one canonical centriole (the PC) in their spermatozoa. Phylogeny based on (Song et al., 2012).

- Phylogeny: Boreoeutheria; Euarchontoglires (Superorder) - Order: Primates
  - African green monkey (*Cercopithecus aethiops*) (Bedford, 1967)
  - Homo sapiens* (Pedersen, 1969) (Garanina et al., 2019)
- Phylogeny: Boreoeutheria; Euarchontoglires (Superorder); Glires Order: Rodentia
  - Siberian chipmunk (*Tamias sibiricus*) (Lee and Park, 2011)
  - Chinchilla (Healey and Weir, 1970)
  - Guinea Pig (Caviidae) (Fawcett, 1965)
- Phylogeny: Boreoeutheria; Laurasiatheria (Superorder) - Order: Carnivora
  - Cat (Schmehl and Graham, 1989) (Sato and Oura, 1984)
- Phylogeny: Boreoeutheria; Laurasiatheria (Superorder) - Order: Chiroptera
  - Bat (Bernard and Hodgson, 1988)
- Phylogeny: Boreoeutheria; Laurasiatheria (Superorder) - Order: Eulipotyphla
  - Lesser white-toothed shrew (*Crocidura suaveolens*) (Soon-Jeong et al., 2006)
- Phylogeny: Boreoeutheria; Laurasiatheria (Superorder) - Order: Artiodactyla
  - Boar (Nicander and Bane, 1962)
  - Bovine (Ounjai et al., 2012)
  - Camel (Tingari, 1991)
- Phylogeny: Boreoeutheria; Laurasiatheria (Superorder) - Order: Perissodactyla
  - Horse (Leung et al., 2021)
- Phylogeny: Afrotheria; Order: Proboscidea
  - Asiatic elephant (*Elephas maximus*) (Heath et al., 1983)
- Phylogeny: Afrotheria Order: Macroscelidea
  - Macroscelidea (elephant shrews) (Woodall and FitzGibbon, 1995)
- Phylogeny: Xenarthra
  - Six-banded armadillo (*Euphractus sexcinctus*) (Sousa et al., 2013)

**bii) Monotreme:** The structure of the sperm neck is simpler in Monotreme Mammals than in Eutherian Mammals: While a PC is found near the nucleus, and the mitochondria reach the nucleus, neither striated columns nor a canonical DC are observed (Carrick and Hughes, 1982).

**biii) Marsupial:** In Marsupials, the DC is not observed or persists in a modified form (Lloyd et al., 2002; Temple-Smith, 1994). The PC (aka transverse centriole) is observed in some species (Lloyd et al., 2002), having been reported in the mature spermatozoa of *Perameles nasuta*, *Macrotis lagotis*, several dasyurids, the petaurid genus *Petaurus*, and the peramelid *Isoodon macrourus* ((Sapsford et al., 1969) and (Johnston et al., 1995) in (Lloyd et al., 2002)). A remnant PC is present in *Hypsiprymnodon moschatus* (Lloyd et al., 2002). No PC is detected in *Trichosurus vulpecula* and most macropods ((Harding, 1979) in (Lloyd et al., 2002)).

21 **b References:**

- 22 Bedford, J.M. 1967. Observations on the fine structure of spermatozoa of the bush baby (*Galago senegalensis*), the African green  
23 monkey (*Cercopithecus aethiops*) and man. *The American journal of anatomy*. 121:443-459.
- 24 Bernard, R.T., and A.N. Hodgson. 1988. Fine structure of the neck of epididymal spermatozoa of Schreiber's long-fingered bat  
25 (*Chiroptera: Mammalia*). *Gamete Res.* 21:41-50.
- 26 Carrick, F.N., and R.L. Hughes. 1982. Aspects of the Structure and Development of Monotreme Spermatozoa and Their Relevance  
27 to the Evolution of Mammalian Sperm Morphology. *Cell and Tissue Research*. 222:127-141.
- 28 Fawcett, D.W. 1965. The anatomy of the mammalian spermatozoon with particular reference to the guinea pig. *Z Zellforsch Mikrosk*  
29 *Anat.* 67:279-296.
- 30 Garanina, A.S., I.B. Alieva, E.E. Bragina, E. Blanchard, B. Arbeille, F. Guerif, S. Uzbekova, and R.E. Uzbekov. 2019. The Centriolar  
31 Adjunct(-)Appearance and Disassembly in Spermiogenesis and the Potential Impact on Fertility. *Cells*. 8:180.
- 32 Harding, H.R. 1979. Reproduction in male marsupials. A critique with additional observation on sperm development and structure,  
33 Elibrary..
- 34 Healey, P., and B.J. Weir. 1970. Changes in the ultrastructure of chinchilla spermatozoa in different diluents. *J Reprod Fertil*. 21:191-  
35 193.
- 36 Heath, E., R. Jeyendran, and E. Graham. 1983. Ultrastructure of Spermatozoa of the Asiatic Elephnat (*Elephas maximus*).  
37 *Anatomia, Histologia, Embryologia*. 12:245-252.
- 38 Johnston, S., L. Daddow, and F. Carrick. 1995. Ultrastructural and light microscopic observations of mature epididymal spermatozoa  
39 and sperm maturation of the greater bilby *Macrotis lagotis* (Metatheria, Mammalia). *Advances in Spermatozoal Phylogeny and*  
40 *Taxonomy*. 166:397-407.
- 41 Lee, J.-H., and K.-R. Park. 2011. Fine Structure of Sperm in the Korea Squirrel, *Tamias sibiricus*. *Applied Microscopy*. 41:99-107.
- 42 Leung, M.R., M.C. Roelofs, R.T. Ravi, P. Maitan, H. Henning, M. Zhang, E.G. Bromfield, S.C. Howes, B.M. Gadella, H. Bloomfield-  
43 Gadelha, and T. Zeev-Ben-Mordehai. 2021. The multi-scale architecture of mammalian sperm flagella and implications for ciliary  
44 motility. *EMBO J*. 40:e107410.
- 45 Lloyd, S., F. Carrick, and L. Hall. 2002. Ultrastructure of the mature spermatozoon of the musky rat-kangaroo, *Hypsiprymnodon*  
46 *moschatus* (Potoroidae: Marsupialia). *Acta Zoologica*. 83:167-174.
- 47 Nicander, L., and A. Bane. 1962. Fine structure of boar spermatozoa. *Z Zellforsch Mikrosk Anat*. 57:390-405.
- 48 Ounjai, P., K.D. Kim, P.V. Lishko, and K.H. Downing. 2012. Three-dimensional structure of the bovine sperm connecting piece  
49 revealed by electron cryotomography. *Biology of reproduction*. 87:73.
- 50 Pedersen, H. 1969. Ultrastructure of the ejaculated human sperm. *Z Zellforsch Mikrosk Anat*. 94:542-554.
- 51 Sapsford, C., C.A. Rae, and K. Cleland. 1969. Ultrastructural studies on maturing spermatids and on sertoli cells in the bandicoot  
52 *Perameles nasuts* Geoffroy (Marsupialia). *Australian Journal of Zoology*. 17:195-292.
- 53 Sato, N., and C. Oura. 1984. The fine structure of the neck region of cat spermatozoa. *Okajimas folia anatomica Japonica*. 61:267-  
54 285.
- 55 Schmehl, M., and E. Graham. 1989. Ultrastructure of the domestic tom cat (*Felisdomestica*) and tiger (*Pantheratigrisaltaica*)  
56 spermatozoa. *Theriogenology*. 31:861-874.
- 57 Song, S., L. Liu, S.V. Edwards, and S.Y. Wu. 2012. Resolving conflict in eutherian mammal phylogeny using phylogenomics and  
58 the multispecies coalescent model. *Proceedings of the National Academy of Sciences of the United States of America*. 109:14942-  
59 14947.
- 60 Soon-Jeong, J., P. Joo-Cheol, K. Heung-Joong, S.B. Chun, Y. Myung-Hee, L. Do-Seon, and J. Moon-Jin. 2006. Comparative fine  
61 structure of the epididymal spermatozoa from three Korean shrews with considerations on their phylogenetic relationships. *Biocell*.  
62 30:279-286.
- 63 Sousa, P.C., E.A. Santos, J.A. Bezerra, G.L. Lima, T.S. Castelo, J.D. Fontenele-Neto, and A.R. Silva. 2013. Morphology,  
64 morphometry and ultrastructure of captive six-banded armadillo (*Euphractus sexcinctus*) sperm. *Animal reproduction science*.  
65 140:279-285.
- 66 Temple-Smith, P.D. 1994. Comparative structure and function of marsupial spermatozoa. *Reprod Fertil Dev*. 6:421-435.
- 67 Tingari, M. 1991. Studies on camel semen. III. Ultrastructure of the spermatozoon. *Animal reproduction science*. 26:333-344.
- 68 Woodall, P.F., and C. FitzGibbon. 1995. Ultrastructure of Spermatozoa of the Yellow-rumped Elephant Shrew *Rhynchocyon*  
69 *chrysopygus* (Mammalia: Macroscelidea) and the Phylogeny of Elephant Shrews. *Acta Zoologica*. 76:19-23.

70 **Supplementary Table 1 – In rodents, FAM161A is evolving more quickly than the other rod proteins**  
71 **in Muridae.**

72

| <b>Gene</b>                        | <i>FAM161A</i><br>(Muridae) | <i>FAM161A</i><br>(Cricetidae) | <i>FAM161A</i><br>(Other<br>Myomorpha) | <i>FAM161A</i><br>(Rodents) | <i>FAM161B</i><br>(Rodents) | <i>POC1b</i><br>(Rodents) | <i>POC5</i><br>(Rodents) | <i>CETN1</i><br>(Rodents) | <i>WDR90</i><br>(Rodents) |
|------------------------------------|-----------------------------|--------------------------------|----------------------------------------|-----------------------------|-----------------------------|---------------------------|--------------------------|---------------------------|---------------------------|
| <b><math>\omega</math> (dN/dS)</b> | 0.62960                     | 0.57030                        | 0.48616                                | 0.57592                     | 0.33602                     | 0.19055                   | 0.26702                  | 0.03423                   | 0.26510                   |

73

74 **Supplementary Table 2– Codon-wide selection analysis to identify sites under positive and negative**  
 75 **selection.**

76 Selection analysis identified more positively (Green font) and negatively (red font) selected sites in rodents  
 77 than in primates, Carnivora, and ungulates. The number of codons used in each lineage is indicated in  
 78 parentheses. The number of selected sites and the site numbers along the primary structure are indicated  
 79 for each method and mammalian order. MEME<sup>2</sup> is a generalization of FEL<sup>3</sup>. The initial analytical phases of  
 80 the two approaches are identical; however, FEL assumes that the same dN/dS ( $\omega$ ) ratio applies to all  
 81 branches, while MEME models variable dN/dS ( $\omega$ ) values across lineages at an individual site.

| <b>Selection Analysis</b>                                          | <b>Ungulates</b><br>722 codons                                                                                                                                                                                      | <b>Carnivora</b> <sup>722 c</sup><br>odons                                                                                                                                                                    | <b>Primates</b><br>716 codons                                                                                                                                                                   | <b>Rodents</b><br>714 codons                                                                                                                                                                                                                                                                                                                                                                                                                                                                                                                                                                        |
|--------------------------------------------------------------------|---------------------------------------------------------------------------------------------------------------------------------------------------------------------------------------------------------------------|---------------------------------------------------------------------------------------------------------------------------------------------------------------------------------------------------------------|-------------------------------------------------------------------------------------------------------------------------------------------------------------------------------------------------|-----------------------------------------------------------------------------------------------------------------------------------------------------------------------------------------------------------------------------------------------------------------------------------------------------------------------------------------------------------------------------------------------------------------------------------------------------------------------------------------------------------------------------------------------------------------------------------------------------|
| <b>MEME:</b><br>Episodic<br>Diversifying<br>Selection<br>(P< 0.05) | <b>9 Sites:</b> 46, 47,<br>49, 60, 62, 67,<br>84, 312, 440,<br>505                                                                                                                                                  | <b>7 sites:</b> (35, 49,<br>60, 65, 451,<br>476, 518, 688                                                                                                                                                     | <b>10 Sites:</b> 44,<br>53, 136, 186,<br>268, 302, 348,<br>633, 634, 695                                                                                                                        | <b>53 Sites:</b> 5, 10, 11, 15, 18, 22, 23, 44,<br>56, 59, 60, 61, 62, 65, 67, 68, 71, 113,<br>134, 135, 174, 177, 230, 237, 254,<br>325,378, 422, 427, 442, 451, 453, 467,<br>479, 633, 634, 635, 636, 639, 657, 680,<br>682, 687, 690, 713                                                                                                                                                                                                                                                                                                                                                        |
| <b>FEL:</b><br>Pervasive<br>Diversifying<br>Selection (P<<br>0.05) | <b>0 Sites</b>                                                                                                                                                                                                      | <b>2 Sites:</b> (27, 65)                                                                                                                                                                                      | <b>2 Sites:</b> 54,<br>268                                                                                                                                                                      | <b>14 Sites:</b> 10, 22, 23, 62, 67, 230, 363,<br>392, 427, 442, 451, 473, 512, 656                                                                                                                                                                                                                                                                                                                                                                                                                                                                                                                 |
| <b>PAML</b><br>(M8 BEB, No<br>*= PP=90, *PP<br>>95, **PP>95)       | <b>5 Sites:</b> 13L,<br>46L, 61A, 61R*,<br>511A*                                                                                                                                                                    | <b>17 Sites:</b> 5H,<br>17T, 27V, 35P,<br>36L*, 65R*,<br>85G, 172C*,<br>219Q, 315Y*,<br>420G, 429C,<br>450H, 476T*,<br>498Y*, 589M*,<br>603Q*                                                                 | <b>6 Sites:</b> 38A,<br>171V, 213R*,<br>306R, 391H*,<br>406C**)                                                                                                                                 | <b>42 Sites:</b> 4P, 22 I**, 45A, 46A**, 48M,<br>52E**, 53Q**, 55K, 56V, 65G*, 67H*,<br>71G*, 78F, 81T, 129F, 130I, 152L*,<br>184T*, 192V, 213*, 221A, 230S, 264*,<br>270R*, 288S, 289C*, 345F, 399S,<br>403C**, 405R*, 406F, 438W**, 442P*,<br>448F*, 451C*, 455C*,467S, 473L*,<br>496R*, 511E*, 512C*, 656F                                                                                                                                                                                                                                                                                       |
| <b>FEL:</b> Purifying<br>Selection<br>(P< 0.05)                    | <b>34 sites:</b> 3, 50,<br>51, 54, 55, 56,<br>107, 135, 146,<br>159, 166, 232,<br>235, 277, 291,<br>294, 295, 298,<br>310, 323, 330,<br>331, 359, 361,<br>371, 390, 463,<br>465, 523, 526,<br>530, 567, 583,<br>603 | <b>38 Sites</b><br>37,38,45,78,91,<br>130,159,163,18<br>2,203,204,212,1<br>49,252,264,273,<br>280,292,296,32<br>8,330,373,398,4<br>02,412,436,447,<br>461,469,479,52<br>2,526,530,535,<br>555,617,634,71<br>4 | <b>37 Sites</b><br>8,12,34,35,58,6<br>2,71,76,83,94,1<br>53,160,178,198<br>,208,211,239,2<br>46,262,273,326<br>,331,369,404,4<br>12,444,452,453<br>,486,517,558,5<br>64,585,586,637<br>,659,664 | <b>100 Sites:</b> 2, 8, 9, 51, 86, 90, 93, 97,<br>98, 101, 103, 105, 111, 121, 138, 140,<br>143, 155, 156, 158, 165, 170, 185, 194,<br>198,<br>205,210,236,240,241,244,245,246,258,<br>274,285,287,292,293,295,300,303,304,<br>305,306,318,321,323,324,326,327,329,<br>330,331,335,337,338,357,358,371,379,<br>389,425,464,484,499,514,518,522,523,<br>534,525,541,548,569,570,575,591,595,<br>598,605,606,610,611,612,615,616,620,<br>622,624,625,626,637,638,654,665,674,<br>679,695,707                                                                                                          |
| <b>FUBAR:</b><br>Pervasive<br>Purifying<br>Selection<br>(P< 90)    | <b>28 Sites:</b> 3, 50,<br>51, 54, 55, 56,<br>60, 107, 135,<br>146, 159, 166,<br>232, 235, 277,<br>294, 310, 325,<br>330, 359, 390,<br>465, 523, 526,<br>530, 567, 583,<br>603                                      | <b>31 Sites:</b> 37,<br>38, 45, 78, 91,<br>130, 159, 182,<br>203, 212, 253,<br>264, 273, 292,<br>296, 328, 330,<br>398, 412, 447,<br>461, 469, 479,<br>522, 526, 530,<br>535, 555, 617,<br>634                | <b>19 Sites:</b> 34,<br>58, 62, 76, 178,<br>208, 239, 262,<br>273, 326, 404,<br>412, 444, 452,<br>486, 517, 586,<br>659, 664                                                                    | <b>107 Sites:</b> 1, 2, 9, 86, 90, 93, 94, 98,<br>101, 103, 105, 109, 115, 138, 140, 143,<br>155, 156, 158, 165, 170, 185, 194, 198,<br>201, 205, 209, 210, 236, 238, 240, 241,<br>243, 244, 246, 258, 274, 276, 280, 281,<br>282, 283, 285, 287, 293, 295, 304, 306,<br>318, 323, 324, 326, 329, 330, 331, 335,<br>337, 338, 354, 356, 358, 364, 371, 465,<br>470, 481, 514, 518, 523, 524, 525, 527,<br>533, 537, 548, 563, 565, 570, 575, 585,<br>591, 592, 595, 598, 605, 606, 610, 612,<br>613, 614, 615, 616, 620, 621, 622, 624,<br>625, 626, 637, 638, 650, 663, 665, 674,<br>693, 695, 707 |

83 **Supplementary Table 3 – Number of negatively selected (NSS) and positively selected (PSS) sites**  
 84 **with P<0.05 using FEL and FUBAR analysis.**  
 85

|                |                                 | Muridae | Cricetidae | Other rodents |
|----------------|---------------------------------|---------|------------|---------------|
| FEL (P<0.05)   | Negatively selected sites (NSS) | 4       | 87         | 48            |
|                | Positively selected sites (PSS) | 14      | 14         | 15            |
| FUBAR (PP >90) | Negatively selected sites (NSS) | 7       | 14         | 28            |
|                | Positively selected sites (PSS) | 0       | 3          | 0             |

86



87 **Supplementary Figure 2– House mice express a Type 3 (555-aa) FAM161A isoform in the testes.**

88 **a)** Various annotated FAM161A isoforms found in house mouse testes, based on transcriptome sequencing  
 89 performed by Green et al 2018 <sup>4</sup>. **b–c)** FAM161A isoform types 1–3 with exons numbered and approximate  
 90 locations of forward, reverse (filled, colored triangles), and sequencing primers (open, colored triangles)  
 91 chosen for PCR with reverse-transcribed mRNA isolated from either house mouse testis or eye tissue (b);  
 92 and electrophoresis gel with expected sizes (in base pairs) of bands produced using the indicated primers  
 93 (c) – “, no band was expected for that reaction. A cDNA library was constructed using a 3’ RACE kit (Roche).  
 94 The First PCR was performed using the cDNA library, the product of which was used to perform the Second  
 95 PCR. Sequencing was performed on the Second PCR product following gel extraction. MW, molecular  
 96 weight. Results were consistent across three independent experiments. **d)** The NCBI house mouse testis  
 97 EST database showed that eight FAM161A transcripts have the unique C-terminus sequence characteristic  
 98 of type 3.

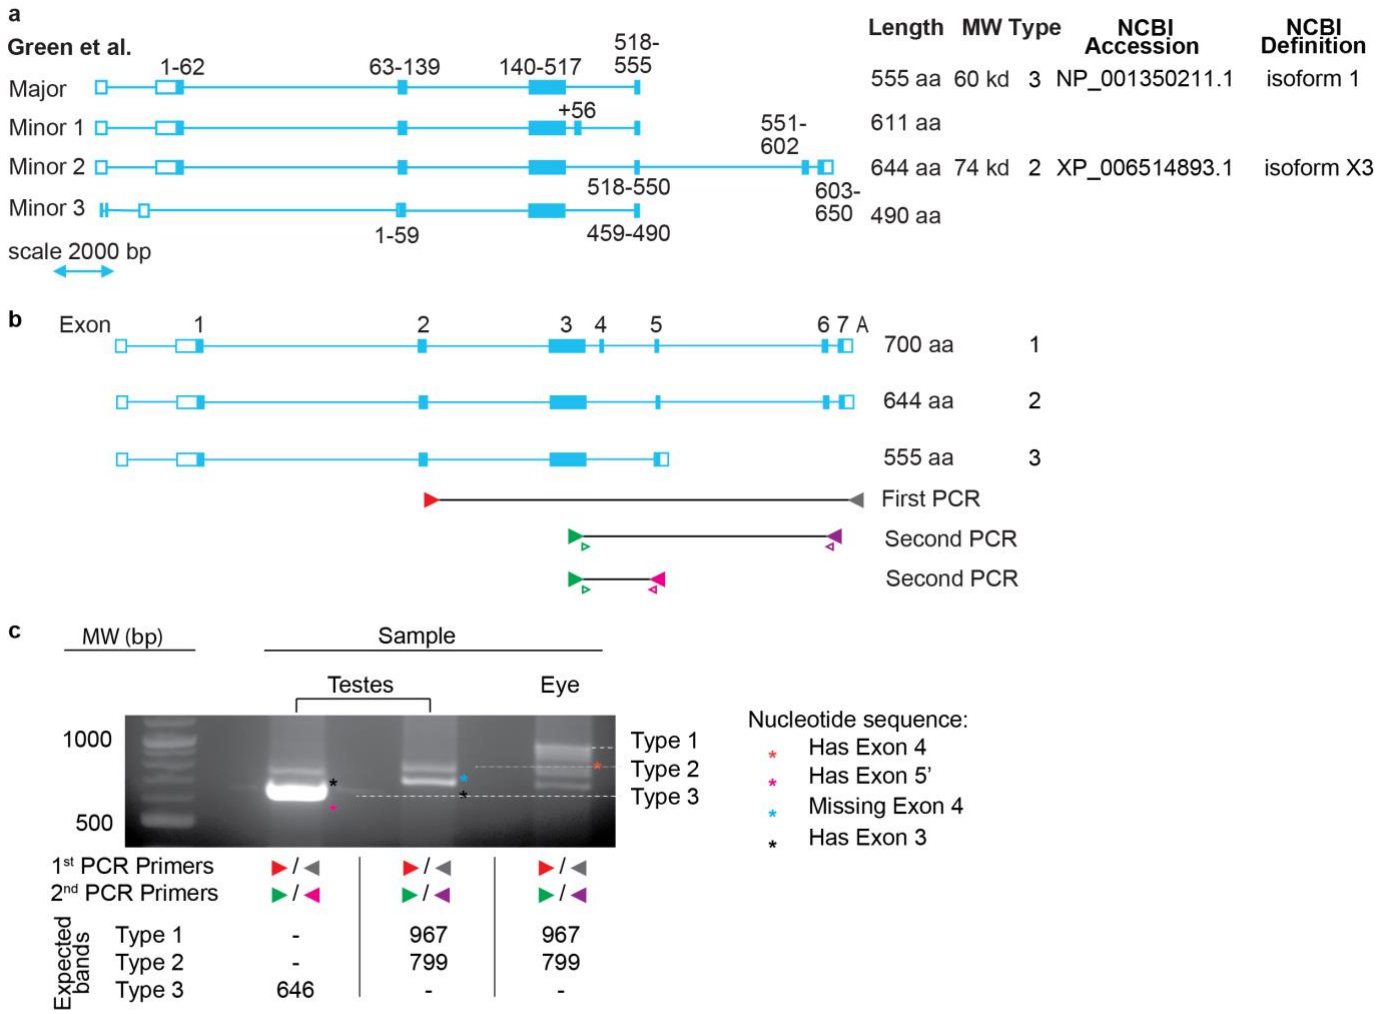

**d** The NCBI mouse testis EST database shows that eight FAM161A transcripts have the unique, C-terminus sequence characteristic of type 3:

99 AV283297.2, AI613936.1, AV262776.1, AA492939.1, BB015036.1, AV257583.1, AV283863.1, AA064510.1.

100  
101

**Supplementary Figure 3 – House mouse and human FAM161A isoforms can localize to canonical centrosomes in U2OS cells.**

102  
103  
104  
105  
106  
107  
108  
109  
110

**a and c)** Human FAM161A (hFAM161A) type 2, house mouse FAM161A (mFAM161A) type 2, and mFAM161A type 3 were localized to the centrosome based on pericentrin (**a**) and  $\gamma$ -tubulin (**c**) labeling in U2OS cells. Human FAM161A type 2 and mFAM161A type 2 also exhibit pericentrosomal localization, probably because these isoforms colocalize with microtubules emanating from the centrosome. **b and d)** Quantification showing the percentage of centrosomes exhibiting centrosomal, pericentrosomal, and non-centrosomal localization of hFAM161A type 2, mFAM161A type 2, and mFAM161A type 3. All experiments were repeated three times with consistent results. Statistical analyses used are unpaired, two-tailed *t* test. Source data are provided at the Source Data File.

**a** FAM161A centrosomal localization based on pericentrin

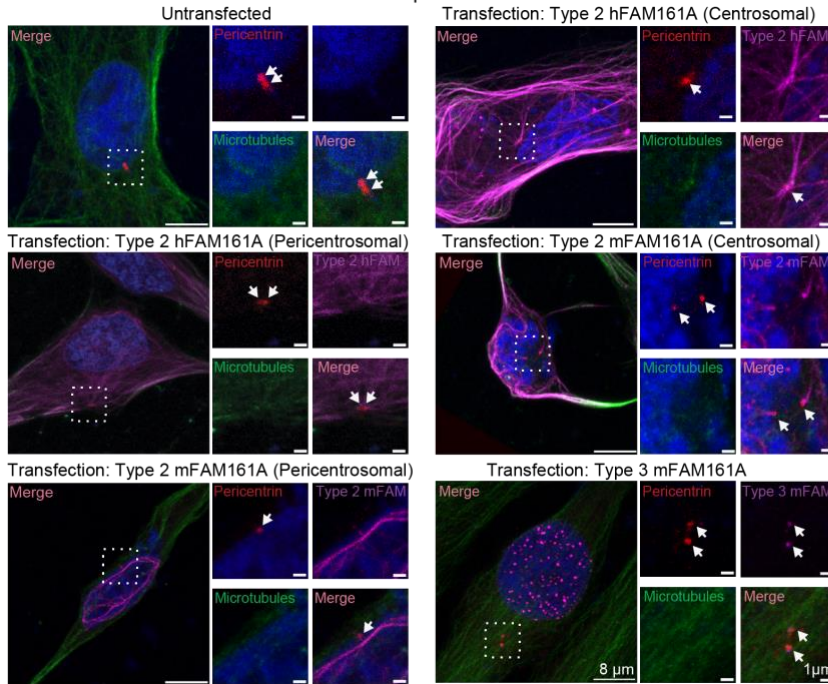

**b**

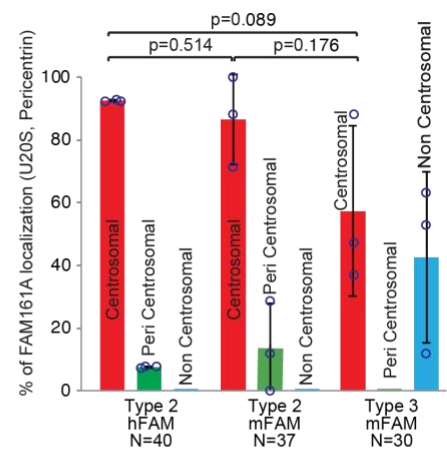

**c** FAM161A localization based on gamma tubulin

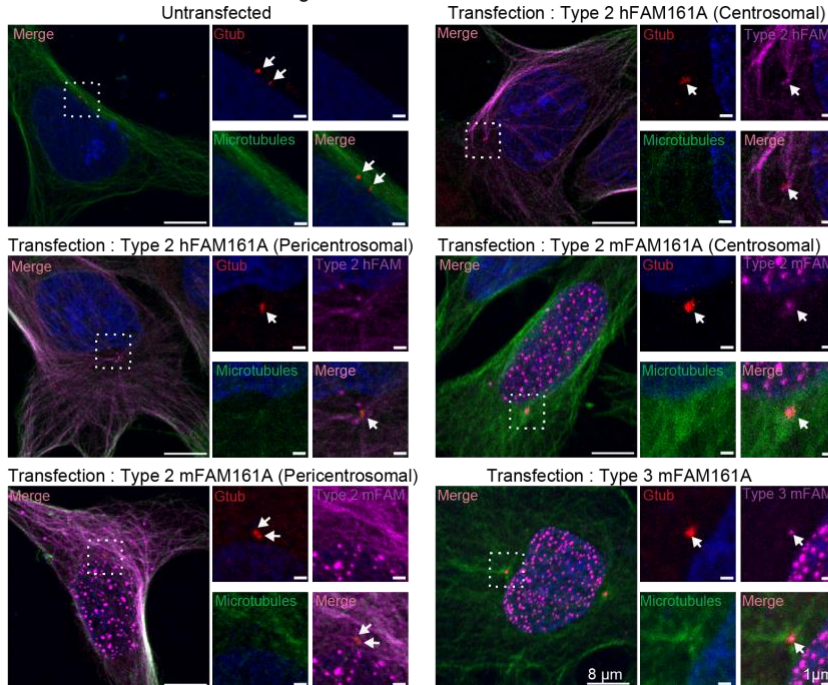

**d**

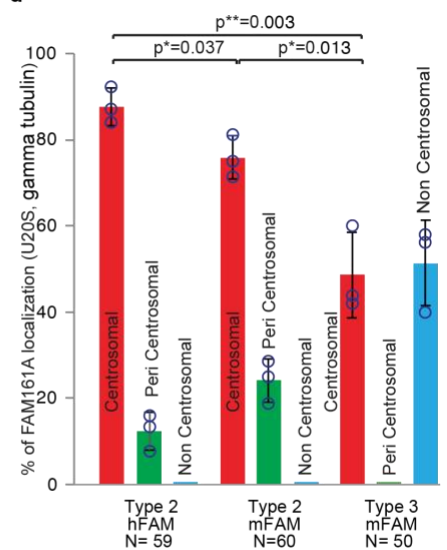

111

112 **Supplementary Figure 4 – House mouse and human FAM161A isoforms can localize to canonical**  
113 **centrioles in 3T3 cells.**

114 **a and c)** Human FAM161A (hFAM161A) type 2, house mouse FAM161A (mFAM161A) type 2, and  
115 mFAM161A type 3 were localized to the centrosome based on pericentrin (**a**) and  $\gamma$ -tubulin (**c**) labeling in  
116 3T3 cells. Human FAM161A type 2 and mFAM161A type 2 also exhibit pericentrosomal localization,  
117 probably because these isoforms colocalize with microtubules emanating from the centrosome. **b and d)**  
118 Quantification showing the percentage of centrioles exhibiting centrosomal, pericentrosomal, and non-  
119 centrosomal localization of hFAM161A type 2, mFAM161A type 2, and mFAM161A type 3. All experiments  
120 were repeated three times with consistent results. Statistical analyses used are unpaired, two-tailed *t* test.  
121 Source data are provided at the Source Data File.

**a** FAM161A localization based on pericentrin

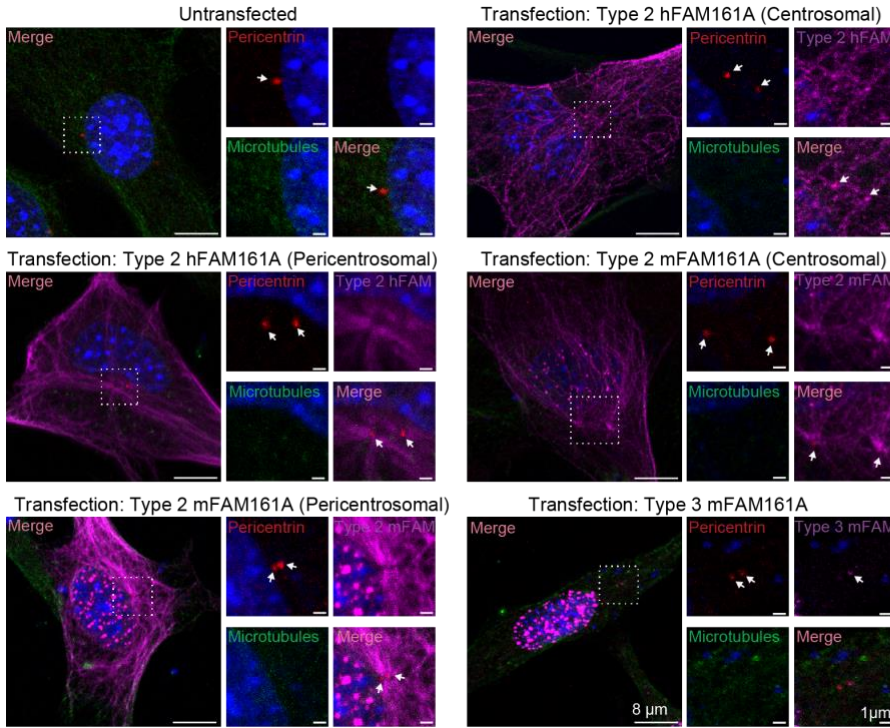

**b**

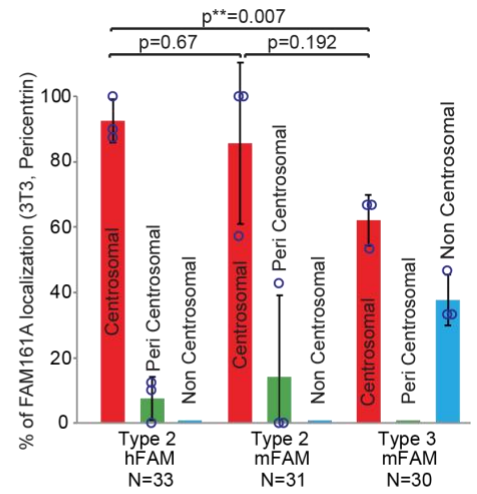

**c** FAM161A localization based on gamma tubulin

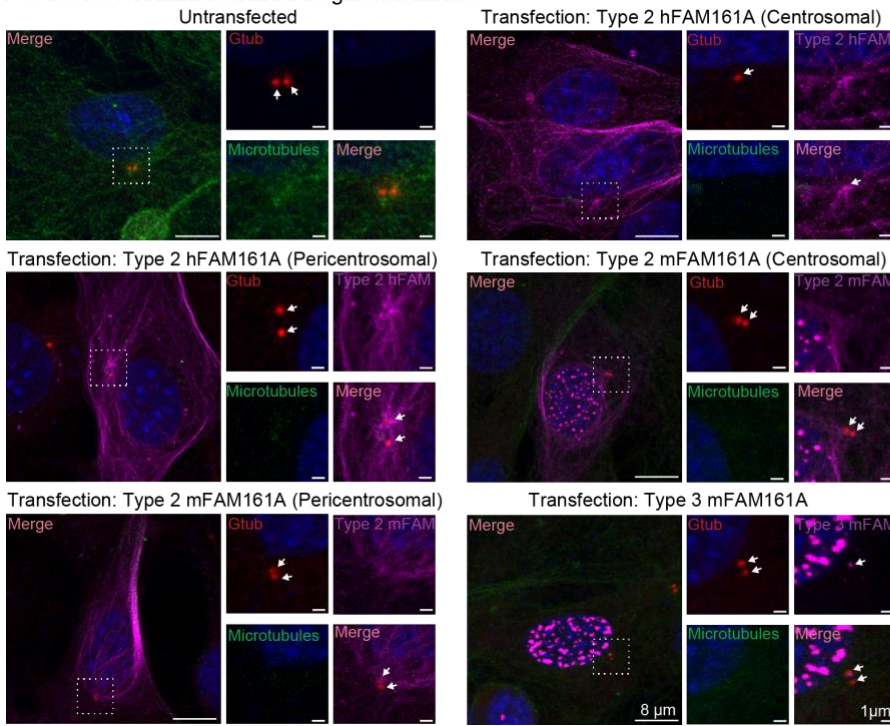

**d**

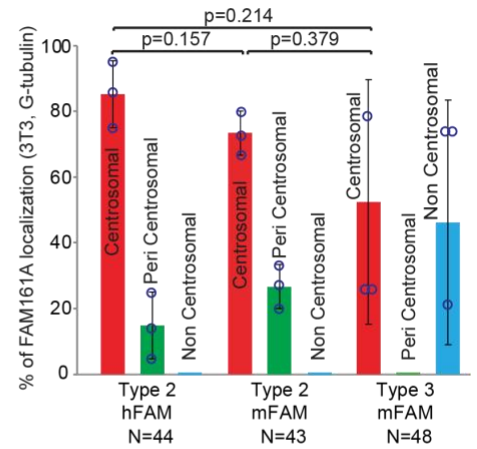

123 **Supplementary Figure 5 – The mechanism of rod protein interaction**

124 **a)** Expression of human FAM161A (hFAM161A) type 2, human POC1B (hPOC1B), and human POC5  
125 (hPOC5) and quantification of their colocalization with tubulin in U2OS cells. **b)** Expression of various  
126 fragments of hFAM161A type 2 with full-length hPOC1B and quantification of FAM161A colocalization with  
127 hPOC1B. **c)** Expression of various fragments of hFAM161A type 2 with hPOC5 and quantification of  
128 FAM161A colocalization with hPOC5. Scale bars are 10  $\mu\text{m}$ . **d)** Yeast two-hybrid analysis to map the  
129 hPOC5-interacting domain of hFAM161A. BD, binding domain; AD, activation domain; DDO, double dropout  
130 (-Leu, -Trp); TDO, triple dropout (-Leu, -Trp, -His); QDO, quadruple dropout (-Leu, -Trp, -His, -Ade). **e)** Yeast  
131 two-hybrid analysis to map the domain mediating the interaction between hPOC1B and hPOC5. **f)** Model  
132 depicting the mechanism of interaction between rod proteins. WD, WD40 repeat domains; CBR, centrin-  
133 binding region; EF-hand, a calcium-binding motif. CC, coiled-coil domain; n, number of cells. The data  
134 shown are the representative images and quantification from three independent experiments. The graphs  
135 are presented as box and whisker plots, where upper and lower bounds show interquartile range, line within  
136 the box shows median, and the whiskers show minimum and maximum data points. \*\*\*\* $P < 0.0001$ ,  
137 \*\*\* $P < 0.001$ , \*\* $P < 0.01$ , \* $P < 0.05$  (unpaired, two-tailed *t*-test, exact p-values are provided in the source data  
138 file), ns, not significant; n= number of transfected cells, BD, Binding Domain; AD, Activation Domain. Source  
139 data are provided in the Source Data File.

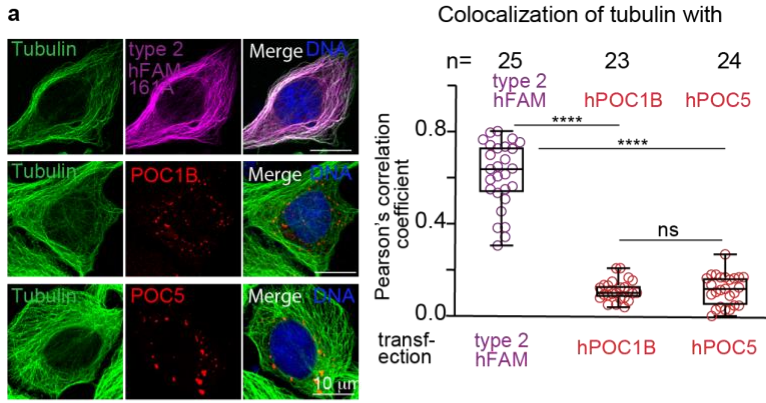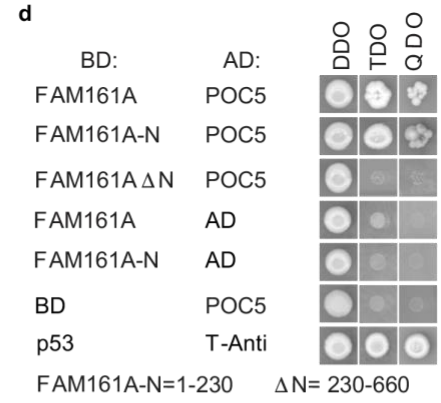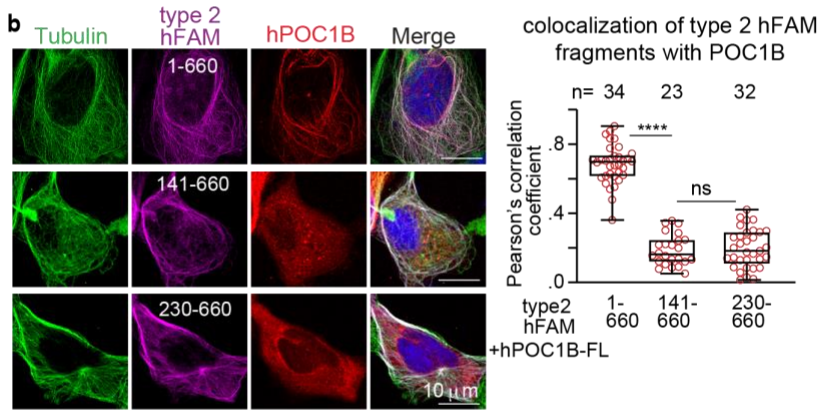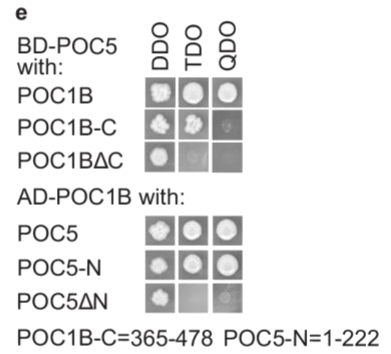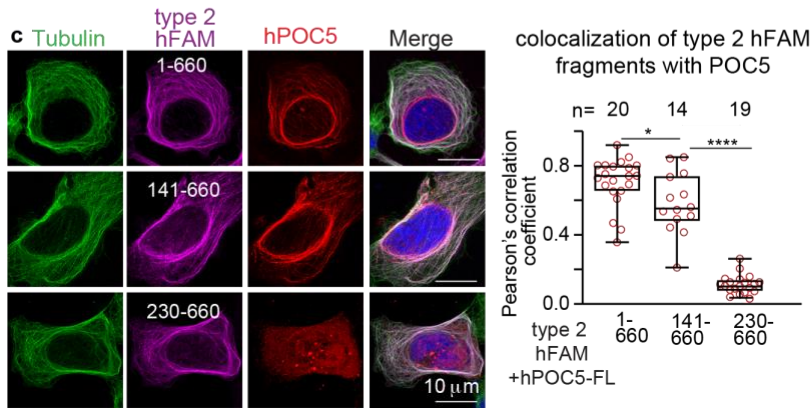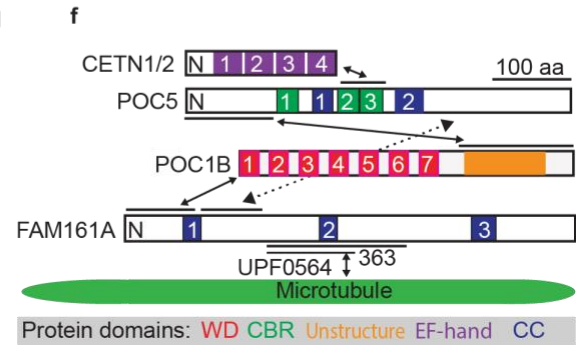

140  
141

142 **Supplementary Figure 6 – FAM161A isoforms exhibit different localization patterns in 3T3 cells.**

143 **a)** Expression analysis of human FAM161A (hFAM161A) type 2 (second panel from left), house mouse  
 144 FAM161A (mFAM161A) type 2 (middle four panels), mFAM161A type 3 (right panel) in 3T3 cells.  
 145 **b)** Quantification showing the percentage of cells exhibiting each of the various expression patterns  
 146 observed during expression analysis of hFAM161A type 2, mFAM161A type 2, and mFAM161A type 3. C,  
 147 “Cytoplasmic”; I, “Intranuclear”; I+C, “Intranuclear + Cytoplasmic”; P, “Perinuclear”. The experiment was  
 148 repeated three times with consistent results. Source data are provided at the Source Data File.

149

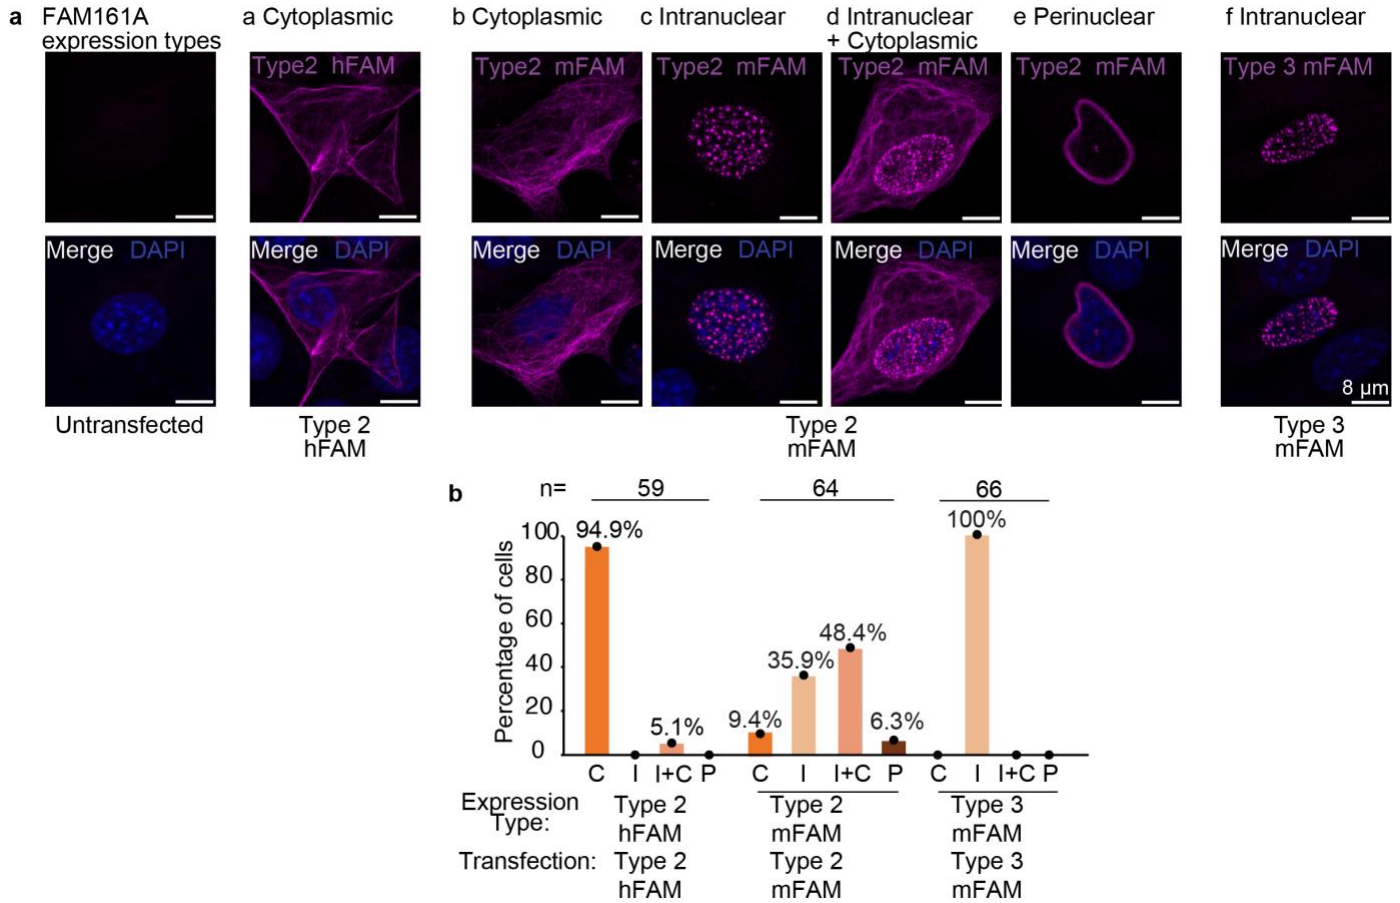

150





156 **Supplementary Figure 8 – POC5 localizes to canonical centrioles when each of the three FAM161A**  
 157 **isoforms are overexpressed.**

158 **a)** POC5 localization relative to overexpressed human FAM161A (hFAM161A) type 2, house mouse  
 159 FAM161A (mFAM161A) type 2, and mFAM161A type 3 in U2OS cells. Human FAM161A type 2 and  
 160 mFAM161A type 2 exhibit centrosomal and pericentrosomal localization. **b)** Quantification showing the  
 161 percentage of centrioles exhibiting centrosomal, pericentrosomal, and non-centrosomal localization of  
 162 hFAM161A type 2, mFAM161A type 2, and mFAM161A type 3. **c)** POC5 localization relative to astral  
 163 microtubules when overexpressing hFAM161A type 2, mFAM161A type 2, and mFAM161A type 3 in U2OS  
 164 cells. **d)** Quantification showing the percentage of cells exhibiting centrosomal localization of POC5 based  
 165 on astral microtubules. All experiments were repeated three times with consistent results. Source data are  
 166 provided at the Source Data File.

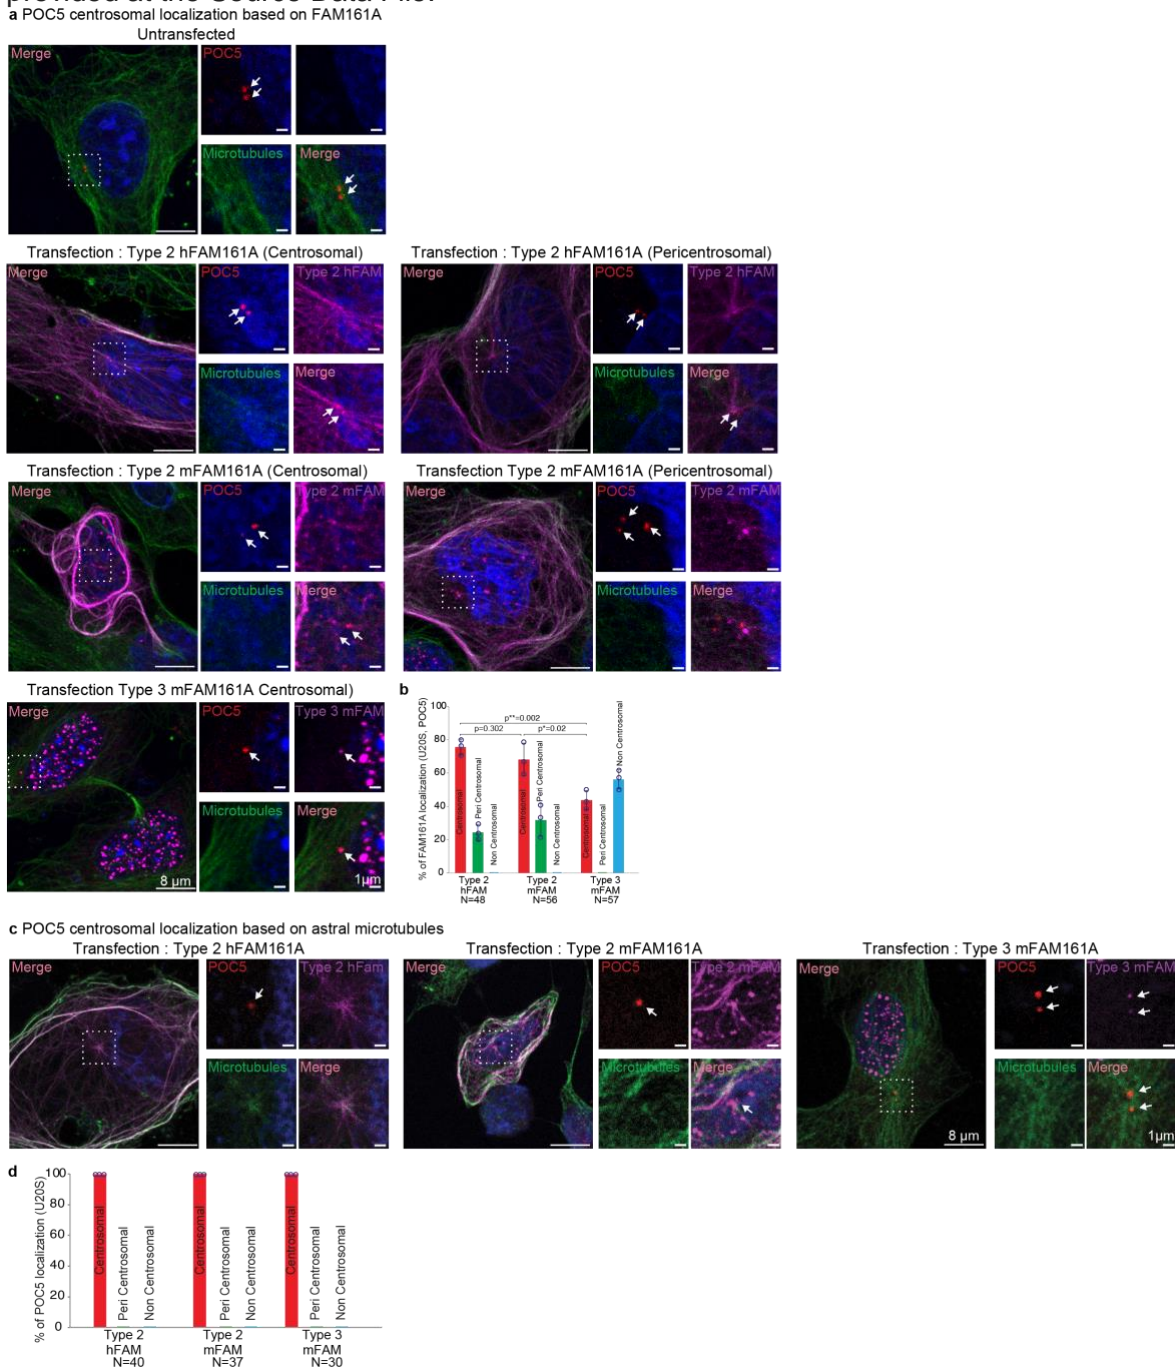

167

168 **Supplementary Figure 9 – House mouse FAM161A type 3 inhibits type 2 from recruiting POC1B to**  
 169 **the microtubules.**

170 **a–c)** Expression of human POC1B (hPOC1B) with house mouse FAM161A (mFAM161A) type 2 (**a**),  
 171 mFAM161A type 3 (**b**), and both mFAM161A types 2 & 3 (**c**). Only one FAM161A isoform at a time is shown  
 172 in panel C; however, the cells were transfected with all three proteins (i.e., hPOC1B and mFAM161A types  
 173 2 & 3). Scale bars are 8  $\mu$ m. **d)** Quantification of hPOC1B colocalization with tubulin under various  
 174 transfection conditions. **e)** mFAM161A type 3 and hPOC1B colocalize in extranuclear foci. Shown in inset.  
 175 The graphs are presented as box and whisker plots, where upper and lower bounds show interquartile  
 176 range, the line within the box shows median, and the whiskers show minimum and maximum data points.  
 177 \*\*\*\* $P < 0.0001$  (unpaired, two tailed *t* test, exact p-values are provided in source data file). n, number of cells.  
 178 Scale bars are 5  $\mu$ m. All images are representative of three independent experiments. The quantification  
 179 data was compiled from three independent experiments. Source data are provided at the Source Data File.

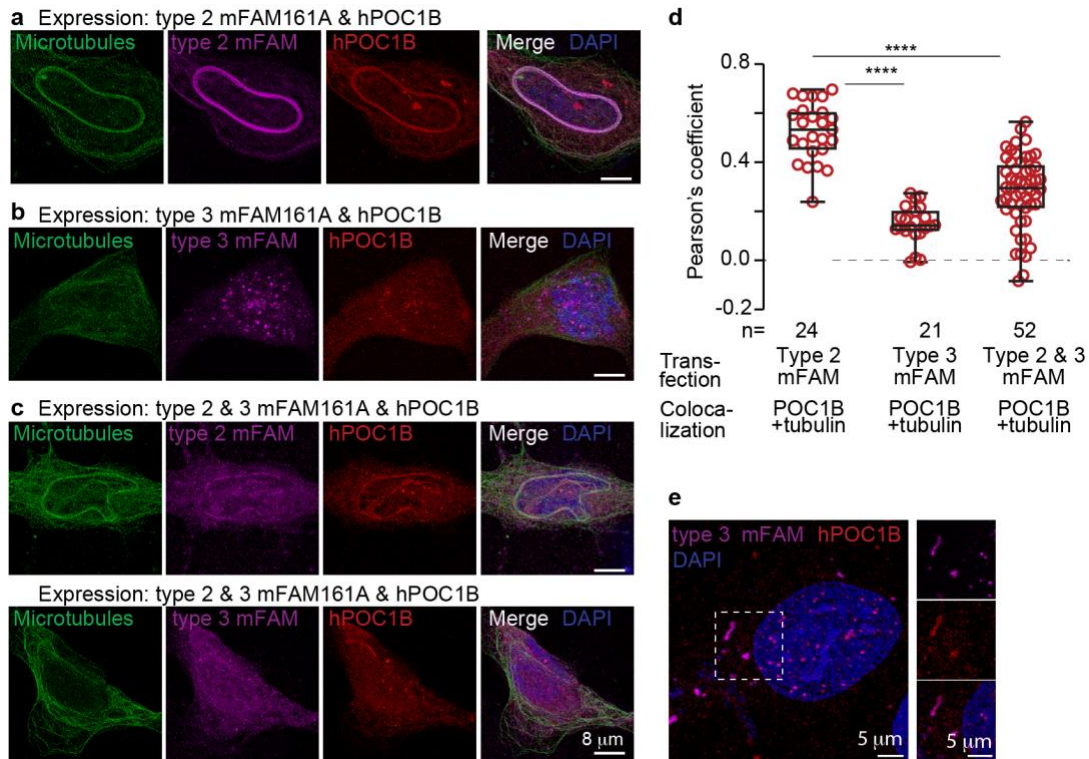

180  
 181

182 **Supplementary Figure 10 – FAM161A labels the proximal and distal centrioles of dog spermatozoa.**

183 Confocal (deconvolution) microscopy of the dog distal centriole showed that FAM161A exhibits prominent  
184 left- and right-side labeling, suggesting that the distal centriolar rods are far away from each other. PC,  
185 proximal centriole; DC, distal centriole; Ax, axoneme. Scale bars are 1  $\mu\text{m}$ . All images are representative of  
186 at least two independent experiments.

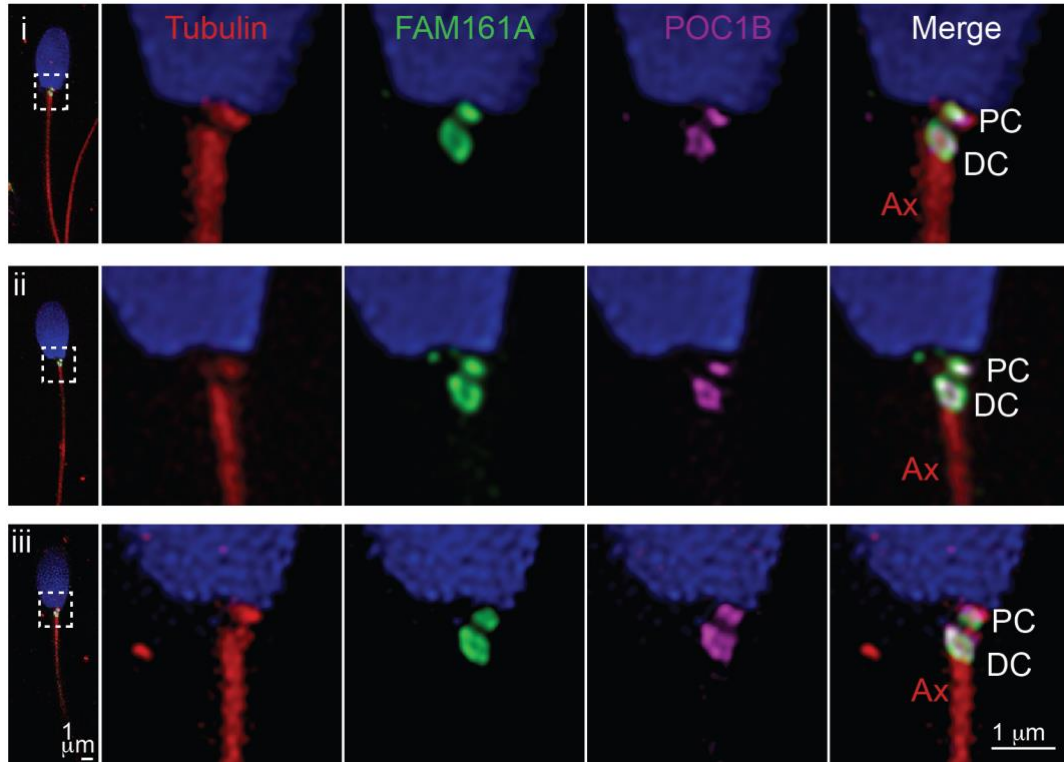

187

188 **Supplementary Figure 11 – Centriole remodeling generates species-specific centriolar sizes.**

189 Quantification of centriolar length based on CETN1 labeling in bovine (Bt), rabbit (Oc), and human (Hs)  
 190 testes at spermatogonia/spermatocyte (Sg) and round spermatid (RS) cell stages. The graphs are presented  
 191 as box and whisker plots, where upper and lower bounds show interquartile range, line within the box shows  
 192 median, and the whiskers show minimum and maximum data points. C1/2, centriole 1/2; PC, proximal  
 193 centriole; DC, distal centriole. \*\*\*\*P<0.0001, \*\*P<0.01 (unpaired, two tailed *t* test, exact p-values are provided  
 194 in source data file); ns, not significant; n, number of centrioles. The result is based on immunostaining with  
 195 CETN1 and confocal imaging. The data was accumulated over three independent experiments. Source data  
 196 are provided at the Source Data File.

197

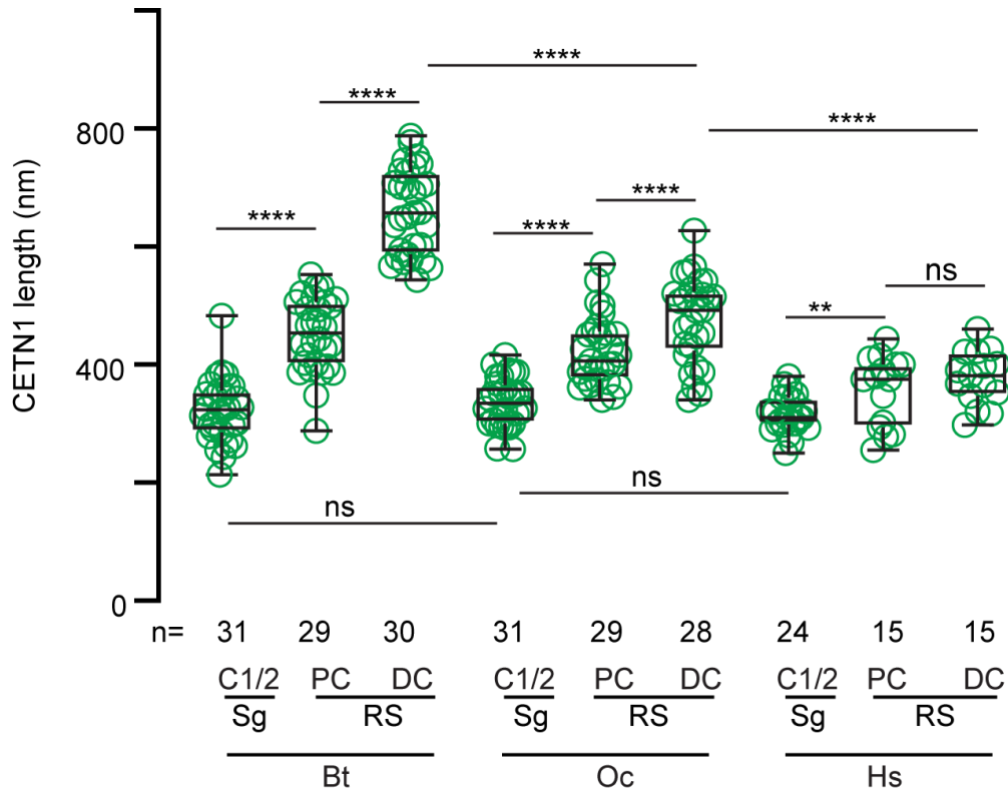

198  
 199

200 **Supplementary Figure 12 – Quantification in the proximal and distal centrioles shows localization**  
 201 **intensity changes similar to that observed during total centriole quantification.**

202 Quantification of various proteins in individual centrioles (C1 and C2) of spermatogonia/spermatocytes (Sg),  
 203 and in proximal and distal centrioles (PC and DC) of round (RS) and elongated spermatids (ES) in bovine.  
 204 The graphs are presented as box and whisker plots, where upper and lower bounds show interquartile  
 205 range, line within the box shows median, and the whiskers show minimum and maximum data points.  
 206 \*\*\*\*P<0.0001, \*\*\*P<0.001, \*\*P<0.01, \*P<0.05 (unpaired, two tailed *t* test, exact p-values are provided in  
 207 source data file); ns, not significant; n, number of cells. Source data are provided at the Source Data File.

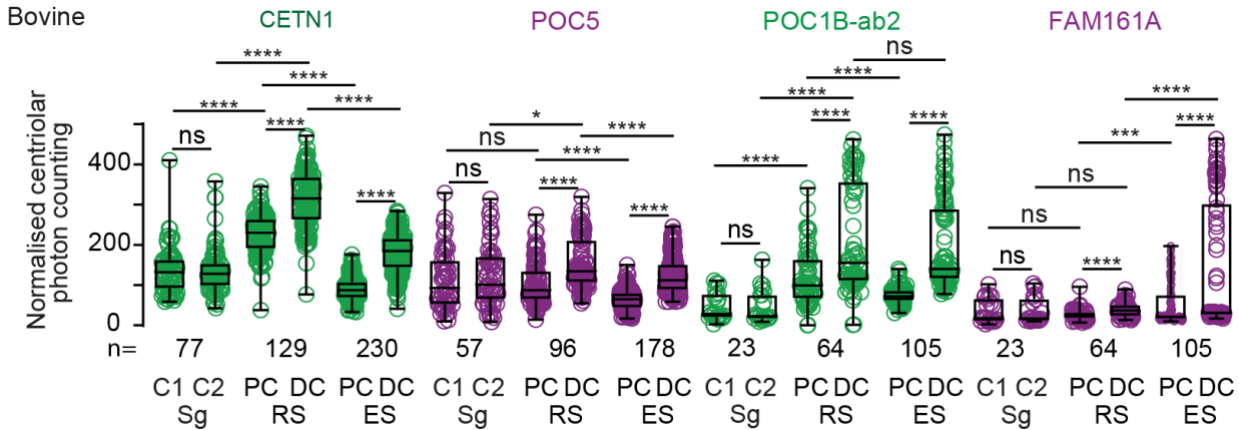

208

209 **Supplementary Figure 13 – The bovine distal centriole begins splaying in round spermatids and**  
 210 **splits in elongated spermatids.**

211 **a)** 3D-STORM imaging of bovine testes with rod protein staining during spermatogenesis. The white arrow  
 212 marks the splayed centriole. **b)** Centriolar length in spermatogonia/spermatocytes (Sg), round spermatids  
 213 (RS), and elongated spermatids (ES). The C1/2 panel includes both C1 and C2. **c)** Proximal and distal  
 214 centriolar width at their caudal (aka tip) and rostral (aka base) ends in round spermatids. C1/2, centrioles 1  
 215 and 2; PC, proximal centriole; DC, distal centriole. **d)** Distal centriolar rod length and width measurements  
 216 based on POC5 staining in elongated spermatids. All data shown were accumulated over three independent  
 217 experiments. The graphs are presented as box and whisker plots, where upper and lower bounds show  
 218 interquartile range, line within the box shows median, and the whiskers show minimum and maximum data  
 219 points. Data shown in **d** is an average  $\pm$  SD. \*\*\*\* $P < 0.0001$ , \*\*\* $P < 0.001$ , \*\* $P < 0.01$ , \* $P < 0.05$  (unpaired, two  
 220 tailed *t* test, exact p-values are provided in source data file); ns, not significant; n, number of centrioles.  
 221 Source data are provided at the Source Data File

222

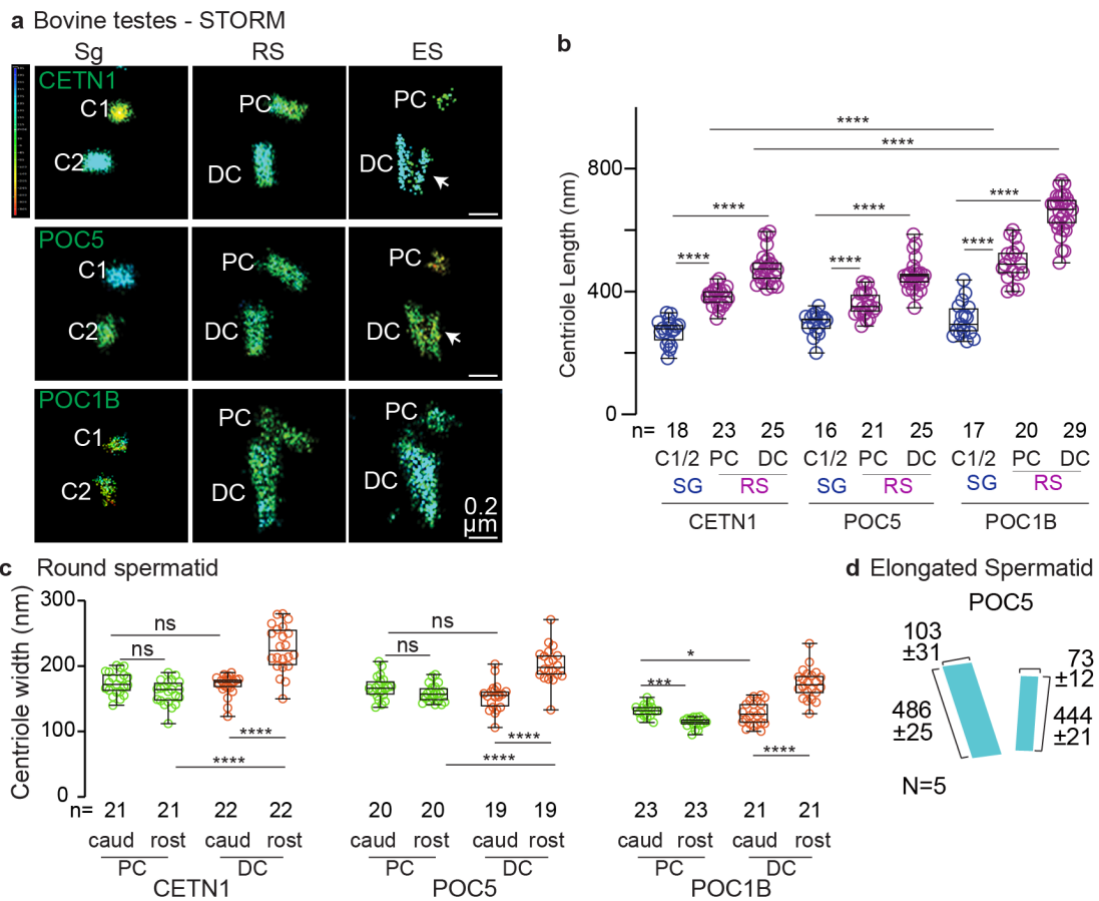

223  
224

225 **Supplementary Figure 14 – FAM161A N-terminus Ab labeling in mouse testes**

226 Immunostaining using FAM161A N-terminus antibody and POC1B ab2 in house mouse round spermatids  
227 (RS). PC, proximal centriole; DC, distal centriole. Scale bars are 1  $\mu$ m. The result was consistent in three  
228 independent immunostainings.

229

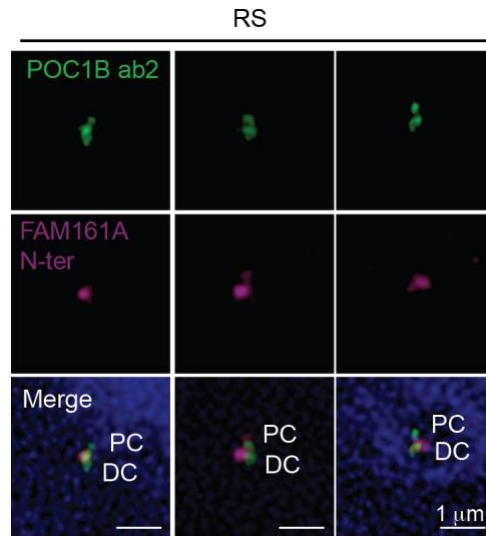

230  
231

232 **Supplementary Figure 15 – Quantification in the proximal and distal centrioles shows localization**  
 233 **intensity changes similar to that observed during total centriole quantification.**

234 Quantification of various proteins in individual centrioles (C1 and C2) of spermatogonia/spermatocytes (Sg),  
 235 and in proximal and distal centrioles (PC and DC) of round (RS) and elongated spermatids (ES) in mice.  
 236 The distal centriole in the round spermatid was determined as the larger and brighter POC5-labeled  
 237 centriole. The graphs are presented as box and whisker plots, where upper and lower bounds show  
 238 interquartile range, line within the box shows median, and the whiskers show minimum and maximum data  
 239 points. \*\*\*\*P<0.0001, \*\*\*P<0.001, \*\*P<0.01, \*P<0.05 (unpaired, two-tailed *t-test*, exact p-values are  
 240 provided in source data file); ns, not significant; n, number of cells. Source data are provided in the Source  
 241 Data File.

*M. Musculus*

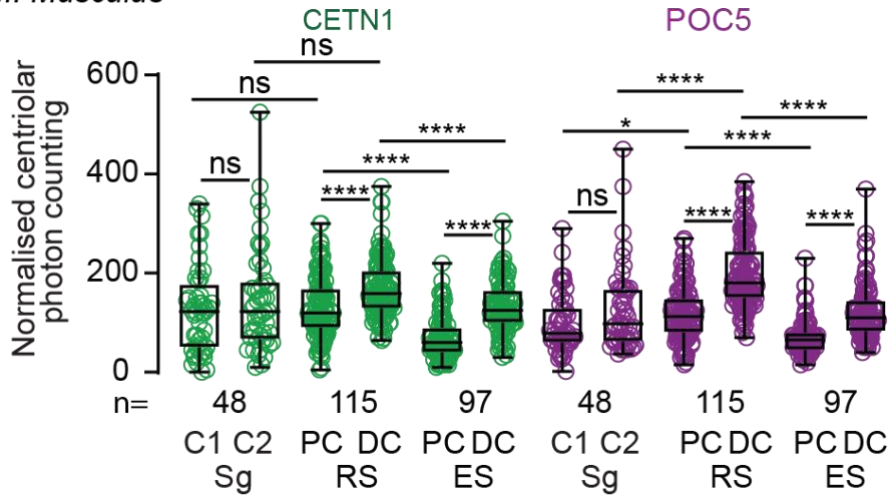

242



243 **Supplementary Table 4 – Antibodies used in this study.**

244

| Antibody<br>(Production animal) | Company<br>(Catalog number)                                              | Concentration (Application)               |
|---------------------------------|--------------------------------------------------------------------------|-------------------------------------------|
| POC5 ab1 (Rabbit)               | Gifted by Dr. Bernan (PMID #19349582)                                    | 1:200 (Confocal)<br>1:100 (STORM)         |
| POC5 ab2 (Rabbit)               | Thermo Fisher Scientific (PA5-24308)                                     | 1:200 (Confocal)<br>1:100 (STORM)         |
| CETN1 (Mouse)                   | Santa Cruz (2A6)                                                         | 1:10 (Confocal)<br>1:5 (STORM)            |
| POC1B ab1 (Rabbit)              | Thermo Fisher Scientific (PA5-24495)                                     | 1:300 (Confocal)                          |
| POC1B ab2 (Mouse)               | Thermo Fisher Scientific (H00282809-B01P)                                | 1:300 (Confocal)<br>1:100 (STORM)         |
| FAM161A ab1 (Rabbit)            | Sigma Aldrich (HPA032119)                                                | 1:300 (Confocal)                          |
| FAM161A ab2 (Rabbit)            | Novus Biologicals (NBP1-91508)                                           | 1:1000 (Western)                          |
| FAM161A N-terminus<br>(Rabbit)  | Gifted by Dr. Dror Sharon (Hadassah-Hebrew<br>University Medical Center) | 1:200 (Confocal)                          |
| Tubulin (Mouse)                 | DSHB (Developmental Studies Hybridoma Bank)<br>(E7)                      | 1:20 (Supernatant)<br>1:100 (Concentrate) |
| Tubulin (Sheep)                 | Cytoskeleton, Inc. (ATN02)                                               | 1:500 (Confocal)                          |
| Anti-HA (Rabbit)                | Invitrogen (SG77)                                                        | 1:200 (Confocal)<br>1:1000 (Western)      |
| Anti-FLAG (Mouse)               | Invitrogen (FG4R)                                                        | 1:400 (Confocal)<br>1:1000 (Western)      |
| Anti-Rabbit A647 (Donkey)       | Jackson ImmunoResearch (711-605-152)                                     | 1:300 (Confocal)<br>1:100 (STORM)         |
| Anti-Mouse A647 (Donkey)        | Jackson ImmunoResearch (715-605-150)                                     | 1:300 (Confocal)<br>1:100 (STORM)         |
| Anti-Rabbit A488 (Donkey)       | Jackson ImmunoResearch (711-545-152)                                     | 1:200 (Confocal)                          |
| Anti-Sheep A555 (Donkey)        | Thermo Fisher Scientific (A-21436)                                       | 1:500 (Confocal)                          |
| Anti-Mouse A488 (Donkey)        | Jackson ImmunoResearch (715-545-150)                                     | 1:200 (Confocal)                          |
| Anti-Sheep A488 (Donkey)        | Jackson ImmunoResearch (715-545-003)                                     | 1:300 (Confocal)                          |

245

246

247 **Supplementary Table 5 – Primers used in this study.**

| Application         | Primer            | Sequence                                                                                                                                |
|---------------------|-------------------|-----------------------------------------------------------------------------------------------------------------------------------------|
| 3' RACE             | Oligo d(T)-Anchor | 5'-GACCACGCGTATCGATGTTCGACTTTTTTTTTTTTTTTTTV-3'<br><i>Mlu</i>   site <i>Cla</i>   site <i>Sal</i>   site, V = A, C, or G (what is that) |
| 1 <sup>st</sup> PCR | 2FW               | 5'-CAGGAAACTCAAAGACCTGAAGG-3'                                                                                                           |
|                     | PCR Anchor        | 5'-GACCACGCGTATCGATGTTCGAC-3'                                                                                                           |
| 2 <sup>nd</sup> PCR | 3FW               | 5'-GCCAGCTGCGAGTGACAAGC-3'                                                                                                              |
|                     | 5RV               | 5'-CTGGAGGAACAAGAGGAAAACTGC-3'                                                                                                          |
|                     | 5*RV              | 5'-GCCTCCACCTTTGTGCTCCGTC-3'                                                                                                            |
|                     | 7RV               | 5'-GAACCACAGCTGACACAAATGG-3'                                                                                                            |
| Sequencing          | Seq. 3FW          | 5'-GCAGACATCAGAGCAGATGAAG-3'                                                                                                            |
|                     | Seq. 5RV          | 5'-GGAGTGAAAAGGCCAGGATGAG-3'                                                                                                            |
|                     | Seq. 5*RV         | 5'-CCAGCTTTCTGTTTCTCAGTAC-3'                                                                                                            |
|                     | Seq. 7RV          | 5'-GGAGAAGAAAGAGAGAATGAGG-3'                                                                                                            |

248

**Supplementary Table 6 – Species analyzed in this study.****a. Rodent sequences analyzed in this study.**

| Organism                                                            | Length of amino acid sequence | Accession ID                   |
|---------------------------------------------------------------------|-------------------------------|--------------------------------|
| <b>Mus musculus</b><br>house mouse                                  | <b>700</b>                    | <a href="#">XM_006514828.5</a> |
| <b>Rattus norvegicus</b><br>Norway rat                              | <b>653</b>                    | <a href="#">XM_017599131.2</a> |
| <b>Heterocephalus glaber</b><br>naked mole-rat                      | <b>706</b>                    | <a href="#">XM_004867228.3</a> |
| <b>Nannospalax galili</b><br>Upper Galilee Mountains blind mole rat | <b>709</b>                    | <a href="#">XM_017800967.2</a> |
| <b>Mesocricetus auratus</b><br>golden hamster                       | <b>695</b>                    | <a href="#">XM_005070431.4</a> |
| <b>Dipodomys ordii</b><br>Ord's kangaroo rat                        | <b>713</b>                    | <a href="#">XM_013022573.1</a> |
| <b>Castor canadensis</b><br>American beaver                         | <b>701</b>                    | <a href="#">XM_020175016.1</a> |
| <b>Mus caroli</b><br>Ryukyu mouse                                   | <b>728</b>                    | <a href="#">XM_029483590.1</a> |
| <b>Mus pahari</b><br>shrew mouse                                    | <b>550</b>                    | <a href="#">XM_029545237.1</a> |
| <b>Peromyscus maniculatus bairdii</b><br>prairie deer mouse         | <b>699</b>                    | <a href="#">XM_006974797.2</a> |
| <b>Jaculus jaculus</b><br>lesser Egyptian jerboa                    | <b>921</b>                    | <a href="#">XM_004665507.1</a> |
| <b>Meriones unguiculatus</b><br>Mongolian gerbil                    | <b>699</b>                    | <a href="#">XM_021626659.1</a> |
| <b>Rattus rattus</b><br>black rat                                   | <b>471</b>                    | <a href="#">XM_032916924.1</a> |
| <b>Grammomys surdaster</b><br>thicket rat                           | <b>260</b>                    | <a href="#">XM_028778791.1</a> |
| <b>Mastomys coucha</b><br>southern multimammate mouse               | <b>495</b>                    | <a href="#">XM_031341979.1</a> |
| <b>Arvicanthis niloticus</b><br>African grass rat                   | <b>641</b>                    | <a href="#">XM_034508367.1</a> |
| <b>Cricetulus griseus</b><br>Chinese hamster                        | <b>703</b>                    | <a href="#">XM_003502153.5</a> |
| <b>Peromyscus leucopus</b><br>white-footed mouse                    | <b>782</b>                    | <a href="#">XM_028876357.2</a> |
| <b>Onychomys torridus</b><br>southern grasshopper mouse             | <b>696</b>                    | <a href="#">XM_036201671.1</a> |
| <b>Arvicola amphibius</b><br>Eurasian water vole                    | <b>704</b>                    | <a href="#">XM_038339639.1</a> |
| <b>Microtus oregoni</b><br>creeping vole                            | <b>705</b>                    | <a href="#">XM_041669288.1</a> |
| <b>Microtus ochrogaster</b><br>prairie vole                         | <b>706</b>                    | <a href="#">XM_026788902.1</a> |
| <b>Cavia porcellus</b><br>domestic guinea pig                       | <b>686</b>                    | <a href="#">XM_013150060.2</a> |
| <b>Octodon degus</b><br>degus                                       | <b>702</b>                    | <a href="#">XM_023720875.1</a> |
| <b>Fukomys damarensis</b><br>Damaraland mole-rat                    | <b>693</b>                    | <a href="#">XM_033762286.1</a> |
| <b>Marmota marmota</b><br>alpine marmot                             | <b>551</b>                    | <a href="#">XM_015479628.1</a> |
| <b>Ictidomys tridecemlineatus</b><br>thirteen-lined ground squirrel | <b>705</b>                    | <a href="#">XM_005322047.4</a> |
| <b>Urocitellus parryii</b>                                          | <b>705</b>                    | <a href="#">XM_026387235.1</a> |

|                                                      |            |                                |
|------------------------------------------------------|------------|--------------------------------|
| Arctic ground squirrel                               |            |                                |
| <b>Marmota flaviventris</b><br>yellow-bellied marmot | <b>705</b> | <a href="#">XM_027934553.1</a> |

251  
252  
253

**b. Carnivore sequences analyzed in this study.**

| Organism                                               | Length of amino acid sequence | Accession ID                   |
|--------------------------------------------------------|-------------------------------|--------------------------------|
| <b>Canis lupus familiaris</b><br>dog                   | 716                           | <a href="#">XM_005626140.4</a> |
| <b>Mustela putorius furo</b><br>domestic ferret        | 729                           | <a href="#">XM_004742028.2</a> |
| <b>Panthera tigris altaica</b><br>Amur tiger           | 665                           | <a href="#">XM_007075417.1</a> |
| <b>Enhydra lutris kenyoni</b><br>northern sea otter    | 720                           | <a href="#">XM_022504396.1</a> |
| <b>Acinonyx jubatus</b><br>cheetah                     | 715                           | <a href="#">XM_027072376.1</a> |
| <b>Lynx canadensis</b><br>Canada lynx                  | 715                           | <a href="#">XM_030310672.1</a> |
| <b>Puma yagouaroundi</b><br>jaguarundi                 | 715                           | <a href="#">XM_040463327.1</a> |
| <b>Puma concolor</b><br>puma                           | 714                           | <a href="#">XM_025932404.1</a> |
| <b>Felis catus</b><br>domestic cat                     | 715                           | <a href="#">XM_003984033.5</a> |
| <b>Panthera pardus</b><br>leopard                      | 715                           | <a href="#">XM_019431779.1</a> |
| <b>Canis lupus dingo</b><br>dingo                      | 716                           | <a href="#">XM_025468782.2</a> |
| <b>Ursus arctos horribilis</b><br>grizzly bear         | 719                           | <a href="#">XM_026485066.1</a> |
| <b>Lontra canadensis</b><br>North American river otter | 721                           | <a href="#">XM_032873831.1</a> |
| <b>Mustela erminea</b><br>ermine                       | 729                           | <a href="#">XM_032353647.1</a> |
| <b>Odobenus rosmarus divergens</b><br>Pacific walrus   | 719                           | <a href="#">XM_004397721.1</a> |
| <b>Hyaena hyaena</b><br>striped hyena                  | 705                           | <a href="#">XM_039240346.1</a> |
| <b>Suricata suricatta</b><br>meerkat                   | 706                           | <a href="#">XM_029937442.1</a> |
| <b>Vulpes lagopus</b><br>Arctic fox                    |                               | <a href="#">XM_041757534.1</a> |
| <b>Vulpes vulpes</b><br>red fox                        | 776                           | <a href="#">XM_025992735.1</a> |
| <b>Ursus maritimus</b><br>polar bear                   | 719                           | <a href="#">XM_040623440.1</a> |
| <b>Ailuropoda melanoleuca</b><br>giant panda           | 720                           | <a href="#">XM_034659197.1</a> |
| <b>Eumetopias jubatus</b><br>Steller sea lion          | 718                           | <a href="#">XM_028089669.1</a> |
| <b>Zalophus californianus</b><br>California sea lion   | 718                           | <a href="#">XM_027624320.1</a> |
| <b>Neomonachus schauinslandi</b><br>Hawaiian monk seal | 721                           | <a href="#">XM_021699187.1</a> |
| <b>Halichoerus grypus</b><br>grey seal                 | 722                           | <a href="#">XM_036121192.1</a> |

254  
255  
256

|                                                   |     |                                |
|---------------------------------------------------|-----|--------------------------------|
| <b>Leptonychotes weddellii</b><br>Weddell seal    | 722 | <a href="#">XM_006733195.2</a> |
| <b>Mirounga leonina</b><br>southern elephant seal | 720 | <a href="#">XM_035001465.1</a> |
| <b>Phoca vitulina</b><br>harbor seal              | 722 | <a href="#">XM_032410896.1</a> |

**c. Ungulate sequences analyzed in this study.**

| Organism                                                         | Length of amino acid sequence | Accession ID                   |
|------------------------------------------------------------------|-------------------------------|--------------------------------|
| <b>Bos taurus</b><br>cattle                                      | 721                           | <a href="#">XM_005212825.4</a> |
| <b>Odocoileus virginianus texanus</b><br>Texas whitetail deer    | 716                           | <a href="#">XM_020891631.1</a> |
| <b>Bison bison</b><br>American bison                             | 721                           | <a href="#">XM_010863278.1</a> |
| <b>Bos indicus x Bos taurus</b><br>hybrid cattle                 | 721                           | <a href="#">XM_027555592.1</a> |
| <b>Bos mutus</b><br>wild yak                                     | 717                           | <a href="#">XM_005889728.2</a> |
| <b>Bos indicus</b><br>zebu                                       | 710                           | <a href="#">XM_019969488.1</a> |
| <b>Bubalus bubalis</b><br>water buffalo                          | 721                           | <a href="#">XM_006049386.2</a> |
| <b>Oryx dammah</b><br>scimitar-horned oryx                       | 810                           | <a href="#">XM_040224006.1</a> |
| <b>Capra hircus</b><br>goat                                      | 722                           | <a href="#">XM_013967738.2</a> |
| <b>Ovis aries</b><br>sheep                                       | 722                           | <a href="#">XM_027966713.2</a> |
| <b>Sus scrofa</b><br>pig                                         | 720                           | <a href="#">XM_003354802.4</a> |
| <b>Vicugna pacos</b><br>alpaca                                   | 723                           | <a href="#">XM_015237028.2</a> |
| <b>Camelus ferus</b><br>wild Bactrian camel                      | 723                           | <a href="#">XM_014564859.2</a> |
| <b>Camelus bactrianus</b><br>Bactrian camel                      | 552                           | <a href="#">XM_010951902.1</a> |
| <b>Camelus dromedarius</b><br>Arabian camel                      | 722                           | <a href="#">XM_010989773.2</a> |
| <b>Neophocaena asiaeorientalis</b><br>Yangtze finless porpoise   | 713                           | <a href="#">XM_024753025.1</a> |
| <b>Balaenoptera acutorostrata scammony</b><br>minke whale        | 717                           | <a href="#">XM_007189708.1</a> |
| <b>Lipotes vexillifer</b><br>Yangtze River dolphin               | 713                           | <a href="#">XM_007464134.1</a> |
| <b>Lagenorhynchus obliquidens</b><br>Pacific white-sided dolphin | 717                           | <a href="#">XM_027131791.1</a> |
| <b>Globicephala melas</b><br>long-finned pilot whale             | 717                           | <a href="#">XM_030877335.1</a> |
| <b>Orcinus orca</b><br>killer whale                              | 717                           | <a href="#">XM_004280649.2</a> |
| <b>Tursiops truncatus</b><br>common bottlenose dolphin           | 717                           | <a href="#">XM_019943077.2</a> |
| <b>Phocoena sinus</b>                                            | 713                           | <a href="#">XM_032653378.1</a> |

|                                              |            |                                |
|----------------------------------------------|------------|--------------------------------|
| vaquita                                      |            |                                |
| <b>Monodon monoceros</b><br>narwhal          | 717        | <a href="#">XM_029232453.1</a> |
| <b>Delphinapterus leucas</b><br>beluga whale | 717        | <a href="#">XM_022597296.2</a> |
| <b>Physeter catodon</b><br>sperm whale       | 727        | <a href="#">XM_024133601.2</a> |
| <b>Balaenoptera musculus</b><br>blue whale   | <b>727</b> | <a href="#">XM_036873937.1</a> |

257  
258  
259

**d. Primate sequences analyzed in this study.**

| Organism                                                              | Length of amino acid sequence | Accession ID                   |
|-----------------------------------------------------------------------|-------------------------------|--------------------------------|
| <b>Homo sapiens</b><br>human                                          | 716                           | <a href="#">NM_001201543.2</a> |
| <b>Pan troglodytes</b><br>chimpanzee                                  | 716                           | <a href="#">XM_515502.6</a>    |
| <b>Macaca mulatta</b><br>rhesus macaque                               | 716                           | <a href="#">XM_028831643.1</a> |
| <b>Macaca fascicularis</b><br>crab-eating macaque                     | 716                           | <a href="#">XM_005575777.2</a> |
| <b>Callithrix jacchus</b><br>white-tufted-ear marmoset                | 715                           | <a href="#">XM_003734729.4</a> |
| <b>Colobus angolensis palliatus</b><br>Angola black-and-white colobus | 562                           | <a href="#">XM_011941831.1</a> |
| <b>Chlorocebus sabaeus</b><br>green monkey                            | 716                           | <a href="#">XM_007970494.2</a> |
| <b>Cercocebus atys</b><br>sooty mangabey                              | 714                           | <a href="#">XM_012039548.1</a> |
| <b>Macaca nemestrina</b><br>pig-tailed macaque                        | 716                           | <a href="#">XM_011713355.2</a> |
| <b>Papio anubis</b><br>olive baboon                                   | 716                           | <a href="#">XM_003908708.5</a> |
| <b>Theropithecus gelada</b><br>gelada                                 | 716                           | <a href="#">XM_025354341.1</a> |
| <b>Mandrillus leucophaeus</b><br>drill                                | 716                           | <a href="#">XM_011987312.1</a> |
| <b>Trachypithecus francoisi</b><br>François' langur                   | 711                           | <a href="#">XM_033239161.1</a> |
| <b>Rhinopithecus bieti</b><br>black snub-nosed monkey                 | 711                           | <a href="#">XM_017889712.1</a> |
| <b>Rhinopithecus roxellana</b><br>golden snub-nosed monkey            | 711                           | <a href="#">XM_010384442.2</a> |
| <b>Ptilocolobus tephrosceles</b><br>Ugandan red colobus               | 711                           | <a href="#">XM_023228337.1</a> |
| <b>Gorilla gorilla</b><br>western gorilla                             | 716                           | <a href="#">XM_004029293.3</a> |
| <b>Pan paniscus</b><br>pygmy chimpanzee                               | 716                           | <a href="#">XM_003830874.3</a> |
| <b>Pongo abelii</b><br>Sumatran orangutan                             | 716                           | <a href="#">NM_001374141.1</a> |
| <b>Nomascus leucogenys</b><br>northern white-cheeked gibbon           | 716                           | <a href="#">XM_003262434.4</a> |
| <b>Hylobates moloch</b><br>silvery gibbon                             | 716                           | <a href="#">XM_032177370.1</a> |
| <b>Saimiri boliviensis</b><br>Bolivian squirrel monkey                | 715                           | <a href="#">XM_039464018.1</a> |

|                                                          |     |                                |
|----------------------------------------------------------|-----|--------------------------------|
| <b>Sapajus apella</b><br>tufted capuchin                 | 715 | <a href="#">XM_032292015.1</a> |
| <b>Cebus imitator</b><br>Panamanian white-faced capuchin | 715 | <a href="#">XM_017522196.2</a> |
| <b>Aotus nancymae</b><br>Ma's night monkey               | 715 | <a href="#">XM_012477168.2</a> |
| <b>Carlito syrichta</b><br>Philippine tarsier            | 715 | <a href="#">XM_008054794.2</a> |
| <b>Propithecus coquereli</b><br>Coquerel's sifaka        | 714 | <a href="#">XM_012639195.1</a> |
| <b>Microcebus murinus</b><br>gray mouse lemur            | 708 | <a href="#">XM_012764864.2</a> |
| <b>Otolemur garnettii</b><br>small-eared galago          | 712 | <a href="#">XM_003787945.1</a> |

260

261 **References**

- 262 1 Plant, T. M. & Zeleznik, A. J. *Knobil and Neill's physiology of reproduction*. (Academic Press, 2014).
- 263 2 Murrell, B. *et al.* Detecting individual sites subject to episodic diversifying selection. *PLoS Genet* **8**,  
264 e1002764 (2012). <https://doi.org/10.1371/journal.pgen.1002764>
- 265 3 Kosakovsky Pond, S. L. & Frost, S. D. Not so different after all: a comparison of methods for detecting  
266 amino acid sites under selection. *Molecular biology and evolution* **22**, 1208-1222 (2005).
- 267 4 Green, C. D. *et al.* A Comprehensive Roadmap of Murine Spermatogenesis Defined by Single-Cell  
268 RNA-Seq. *Dev Cell* **46**, 651-667 e610 (2018). <https://doi.org/10.1016/j.devcel.2018.07.025>

269
