# Supplementary material for: The evolution of centriole degradation in mouse sperm
Source: PubMed Central journal article supplement (PMC10761967; doi:10.1038/s41467-023-44411-8), 2024-01-02
Supplement: 41467_2023_44411_MOESM3_ESM.pdf [file 41467_2023_44411_MOESM3_ESM.pdf]

## **Description of Additional Supplementary Files:**

**Supplementary Data 1:** Survey of original literature on rodent spermatozoan ultrastructure.

**Supplementary Data 2:** Identity Ratio range of sperm centrosomal proteins.
