# Supplementary material for: The evolution of centriole degradation in mouse sperm
Source: PubMed Central journal article supplement (PMC10761967; doi:10.1038/s41467-023-44411-8), 2024-01-02
Supplement: 41467_2023_44411_MOESM6_ESM.pdf [file 41467_2023_44411_MOESM6_ESM.pdf]

## Reporting Summary

Nature Portfolio wishes to improve the reproducibility of the work that we publish. This form provides structure for consistency and transparency in reporting. For further information on Nature Portfolio policies, see our [Editorial Policies](#) and the [Editorial Policy Checklist](#).

### Statistics

For all statistical analyses, confirm that the following items are present in the figure legend, table legend, main text, or Methods section.

n/a Confirmed

- The exact sample size ( $n$ ) for each experimental group/condition, given as a discrete number and unit of measurement
- A statement on whether measurements were taken from distinct samples or whether the same sample was measured repeatedly
- The statistical test(s) used AND whether they are one- or two-sided  
*Only common tests should be described solely by name; describe more complex techniques in the Methods section.*
- A description of all covariates tested
- A description of any assumptions or corrections, such as tests of normality and adjustment for multiple comparisons
- A full description of the statistical parameters including central tendency (e.g. means) or other basic estimates (e.g. regression coefficient) AND variation (e.g. standard deviation) or associated estimates of uncertainty (e.g. confidence intervals)
- For null hypothesis testing, the test statistic (e.g.  $F$ ,  $t$ ,  $r$ ) with confidence intervals, effect sizes, degrees of freedom and  $P$  value noted  
*Give  $P$  values as exact values whenever suitable.*
- For Bayesian analysis, information on the choice of priors and Markov chain Monte Carlo settings
- For hierarchical and complex designs, identification of the appropriate level for tests and full reporting of outcomes
- Estimates of effect sizes (e.g. Cohen's  $d$ , Pearson's  $r$ ), indicating how they were calculated

*Our web collection on [statistics for biologists](#) contains articles on many of the points above.*

### Software and code

Policy information about [availability of computer code](#)

Data collection No unreported custom computer code or algorithm was used.  
We used Leica LAS X program.

Data analysis No unreported custom computer code or algorithm was used.  
We used Microsoft word, Microsoft Excel, Adobe photoshop, Adobe illustrator, GraphPad Prism 8.0, PAML suite, HyPhy suite, MUSCLE, AUGUSTUS gene prediction tool, ModelFinder program in IQTree, MrBayes, FigTree, Nikon's NIS-Elements,

For manuscripts utilizing custom algorithms or software that are central to the research but not yet described in published literature, software must be made available to editors and reviewers. We strongly encourage code deposition in a community repository (e.g. GitHub). See the Nature Portfolio [guidelines for submitting code & software](#) for further information.

### Data

Policy information about [availability of data](#)

All manuscripts must include a [data availability statement](#). This statement should provide the following information, where applicable:

- Accession codes, unique identifiers, or web links for publicly available datasets
- A description of any restrictions on data availability
- For clinical datasets or third party data, please ensure that the statement adheres to our [policy](#)

Relevant data supporting the findings of this study are available in this manuscript and in the supporting information file. Source data and associated measurements

are provided with this manuscript. Data shown in this manuscript are available from the corresponding author with a reasonable request. We have created a project named "The Evolution of Centriole Degradation in Mouse Sperm" in the Figshare public repository that contains the paper's research data.

## Research involving human participants, their data, or biological material

Policy information about studies with [human participants or human data](#). See also policy information about [sex, gender \(identity/presentation\), and sexual orientation](#) and [race, ethnicity and racism](#).

|                                                                    |                                                                              |
|--------------------------------------------------------------------|------------------------------------------------------------------------------|
| Reporting on sex and gender                                        | The research subject is sperm, which is naturally focused on male fertility. |
| Reporting on race, ethnicity, or other socially relevant groupings | Unknown                                                                      |
| Population characteristics                                         | Unknown                                                                      |
| Recruitment                                                        | Recruitment was based on availability in UToledo Biorepository Bank.         |
| Ethics oversight                                                   | IRB #0000202366                                                              |

Note that full information on the approval of the study protocol must also be provided in the manuscript.

## Field-specific reporting

Please select the one below that is the best fit for your research. If you are not sure, read the appropriate sections before making your selection.

Life sciences  Behavioural & social sciences  Ecological, evolutionary & environmental sciences

For a reference copy of the document with all sections, see [nature.com/documents/nr-reporting-summary-flat.pdf](https://nature.com/documents/nr-reporting-summary-flat.pdf)

## Life sciences study design

All studies must disclose on these points even when the disclosure is negative.

|                 |                                                                                                                                                                          |
|-----------------|--------------------------------------------------------------------------------------------------------------------------------------------------------------------------|
| Sample size     | The sample size was not predetermined. The sample size is the number of sperm or centrioles analyzed and is described in the figure or figure legend of each experiment. |
| Data exclusions | No data were excluded.                                                                                                                                                   |
| Replication     | Confocal and STORM experiments was repeated at least three times and results were consistent. The final data pool together results from different experiments.           |
| Randomization   | We did not randomized the experiments.                                                                                                                                   |
| Blinding        | The researchers were not blinded for this study because of its exploratory nature.                                                                                       |

## Reporting for specific materials, systems and methods

We require information from authors about some types of materials, experimental systems and methods used in many studies. Here, indicate whether each material, system or method listed is relevant to your study. If you are not sure if a list item applies to your research, read the appropriate section before selecting a response.

### Materials & experimental systems

| n/a                                 | Involved in the study                                           |
|-------------------------------------|-----------------------------------------------------------------|
| <input type="checkbox"/>            | <input checked="" type="checkbox"/> Antibodies                  |
| <input type="checkbox"/>            | <input checked="" type="checkbox"/> Eukaryotic cell lines       |
| <input checked="" type="checkbox"/> | <input type="checkbox"/> Palaeontology and archaeology          |
| <input type="checkbox"/>            | <input checked="" type="checkbox"/> Animals and other organisms |
| <input checked="" type="checkbox"/> | <input type="checkbox"/> Clinical data                          |
| <input checked="" type="checkbox"/> | <input type="checkbox"/> Dual use research of concern           |
| <input checked="" type="checkbox"/> | <input type="checkbox"/> Plants                                 |

### Methods

| n/a                                 | Involved in the study                           |
|-------------------------------------|-------------------------------------------------|
| <input checked="" type="checkbox"/> | <input type="checkbox"/> ChIP-seq               |
| <input checked="" type="checkbox"/> | <input type="checkbox"/> Flow cytometry         |
| <input checked="" type="checkbox"/> | <input type="checkbox"/> MRI-based neuroimaging |

## Antibodies

|                 |                                                                                                                                                                               |
|-----------------|-------------------------------------------------------------------------------------------------------------------------------------------------------------------------------|
| Antibodies used | Antibody, (Production animal) Company (Catalog number), Concentration (Application)<br>POC5 ab1 (Rabbit) Gifted by Dr. Bernan (PMID #19349582) 1:200 (Confocal) 1:100 (STORM) |
|-----------------|-------------------------------------------------------------------------------------------------------------------------------------------------------------------------------|

POC5 ab2 (Rabbit) Thermo Fisher Scientific (PA5-24308) 1:200 (Confocal) 1:100 (STORM)  
 CETN1 (Mouse) Santa Cruz (2A6) 1:10 (Confocal) 1:5 (STORM)  
 POC1B ab1 (Rabbit) Thermo Fisher Scientific (PA5-24495) 1:300 (Confocal)  
 POC1B ab2 (Mouse) Thermo Fisher Scientific (H00282809-B01P) 1:300 (Confocal) 1:100 (STORM)  
 FAM161A ab1 (Rabbit) Sigma Aldrich (HPA032119) 1:300 (Confocal)  
 FAM161A ab2 (Rabbit) Novus Biologicals (NBP1-91508) 1:1000 (Western)  
 FAM161A N-terminus (Rabbit) Gifted by Dr. Dror Sharon (Hadassah-Hebrew University Medical Center) 1:200 (Confocal)  
 Tubulin (Mouse) DSHB (Developmental Studies Hybridoma Bank) (E7) 1:20 (Supernatant) 1:100 (Concentrate)  
 Tubulin (Sheep) Cytoskeleton, Inc. (ATN02) 1:500 (Confocal)  
 Anti-HA (Rabbit) Invitrogen (SG77) 1:200 (Confocal) 1:1000 (Western)  
 Anti-FLAG (Mouse) Invitrogen (FG4R) 1:400 (Confocal) 1:1000 (Western)  
 Anti-Rabbit A647 (Donkey) Jackson ImmunoResearch (711-605-152) 1:300 (Confocal) 1:100 (STORM)  
 Anti-Mouse A647 (Donkey) Jackson ImmunoResearch (715-605-150) 1:300 (Confocal) 1:100 (STORM)  
 Anti-Rabbit A488 (Donkey) Jackson ImmunoResearch (711-545-152) 1:200 (Confocal)  
 Anti-Sheep A555 (Donkey) Thermo Fisher Scientific (A-21436) 1:500 (Confocal)  
 Anti-Mouse A488 (Donkey) Jackson ImmunoResearch (715-545-150) 1:200 (Confocal)  
 Anti-Sheep A488 (Donkey) Jackson ImmunoResearch (715-545-003) 1:300 (Confocal)

#### Validation

*Describe the validation of each primary antibody for the species and application, noting any validation statements on the manufacturer's website, relevant citations, antibody profiles in online databases, or data provided in the manuscript.*

## Eukaryotic cell lines

Policy information about [cell lines and Sex and Gender in Research](#)

|                                                                      |                                                                 |
|----------------------------------------------------------------------|-----------------------------------------------------------------|
| Cell line source(s)                                                  | U2OS cells were purchased from American Type Culture Collection |
| Authentication                                                       | American Type Culture Collection                                |
| Mycoplasma contamination                                             | No                                                              |
| Commonly misidentified lines<br>(See <a href="#">ICLAC</a> register) | Nothing Found                                                   |

## Animals and other research organisms

Policy information about [studies involving animals; ARRIVE guidelines](#) recommended for reporting animal research, and [Sex and Gender in Research](#)

|                         |                                                                                                                                                                                               |
|-------------------------|-----------------------------------------------------------------------------------------------------------------------------------------------------------------------------------------------|
| Laboratory animals      | No live animals were used - Ejaculated spermatozoa were donated by Dr. Bo Harstine at Select Sires Inc. (bovine, Holstein) and Dr. Jie Xu at the University of Michigan (New Zealand rabbit). |
| Wild animals            | Not applicable.                                                                                                                                                                               |
| Reporting on sex        | The research subject is sperm, which is naturally focused on male fertility.                                                                                                                  |
| Field-collected samples | Not applicable.                                                                                                                                                                               |
| Ethics oversight        | Tissues were collected from discarded euthanized research animals from the University of Toledo, University of Maryland, and the University of Michigan or purchased from a slaughterhouse.   |

Note that full information on the approval of the study protocol must also be provided in the manuscript.
